1 **TITLE:** Longitudinal Profiling of the Intestinal Microbiome in Children with Cystic Fibrosis  
2 Treated with Elexacaftor-Tezacaftor-Ivacaftor

3  
4 **WORD COUNT (MAIN TEXT): 4733**

5  
6 **AUTHORS:** Seth A. Reasoner<sup>1\*</sup>, Rachel Bernard<sup>2\*</sup>, Adam Waalkes<sup>3</sup>, Kelsi Penewit<sup>3</sup>, Janessa  
7 Lewis<sup>3</sup>, Andrew G. Sokolow<sup>4</sup>, Rebekah F. Brown<sup>4</sup>, Kathryn M. Edwards<sup>5</sup>, Stephen J. Salipante<sup>3</sup>,  
8 Maria Hadjifrangiskou<sup>1,6,7</sup>, Maribeth R. Nicholson<sup>2,7</sup>

9  
10 **AFFILIATIONS:**

11 1. Division of Molecular Pathogenesis, Department of Pathology, Microbiology & Immunology,  
12 Vanderbilt University Medical Center, Nashville, TN, USA

13 2. Division of Gastroenterology, Hepatology, and Nutrition, Department of Pediatrics, Monroe  
14 Carrell Junior Children's Hospital at Vanderbilt, Nashville, TN, USA

15 3. Department of Laboratory Medicine and Pathology, University of Washington, Seattle, WA,  
16 USA

17 4. Division of Allergy, and Immunology, and Pulmonary Medicine, Department of Pediatrics,  
18 Monroe Carrell Junior Children's Hospital at Vanderbilt, Nashville, TN, USA

19 5. Division of Infectious Diseases, Department of Pediatrics, Monroe Carrell Junior Children's  
20 Hospital at Vanderbilt, Nashville, Tennessee, USA

21 6. Center for Personalized Microbiology (CPMi), Vanderbilt University Medical Center, Nashville,  
22 TN, USA

23 7. Vanderbilt Institute for Infection, Immunology and Inflammation, Vanderbilt University Medical  
24 Center, Nashville, Tennessee, USA

25  
26 *\*These authors contributed equally to this work. Authorship position was determined by relative  
27 contributions made to this manuscript's completion.*

28  
29  
30 **Corresponding Author:**

31 Maribeth R. Nicholson, MD, MPH  
32 Monroe Carell Jr. Children's Hospital at Vanderbilt  
33 2200 Children's Way, Nashville, TN 37232  
34 Telephone: +1 615 322 7449  
35 E-mail: maribeth.r.nicholson@vumc.org

36  
37  
38 **RUNNING TITLE:** CF Gut Microbiome Following CFTR Modulator ELX/TEZ/IVA

39  
40  
41 **KEY WORDS**

42 Cystic fibrosis; CFTR modulators; microbiome; elexacaftor; ivacaftor; tezacaftor; metagenomic  
43 sequencing; intestinal inflammation; antibiotic resistance; pediatric

44

45        **ABSTRACT**

46        The intestinal microbiome influences growth and disease progression in children with cystic  
47        fibrosis (CF). Elexacaftor-tezacaftor-ivacaftor (ELX/TEZ/IVA), the newest pharmaceutical  
48        modulator for CF, restores function of the pathogenic mutated CFTR channel. We performed a  
49        single-center longitudinal analysis of the effect of ELX/TEZ/IVA on the intestinal microbiome,  
50        intestinal inflammation, and clinical parameters in children with CF. Following ELX/TEZ/IVA,  
51        children with CF had significant improvements in BMI, ppFEV<sub>1</sub> and required fewer antibiotics for  
52        respiratory infections. Intestinal microbiome diversity increased following ELX/TEZ/IVA coupled  
53        with a decrease in the intestinal carriage of *Staphylococcus aureus*, the predominant respiratory  
54        pathogen in children with CF. There was a reduced abundance of microbiome-encoded  
55        antibiotic-resistance genes. Microbial pathways for aerobic respiration were reduced after  
56        ELX/TEZ/IVA. The abundance of microbial acid tolerance genes was reduced, indicating  
57        microbial adaptation to increased CFTR function. In all, this study represents the first  
58        comprehensive analysis of the intestinal microbiome in children with CF receiving ELX/TEZ/IVA.

59

60

61        **IMPORTANCE**

62        Cystic fibrosis is an autosomal recessive disease with significant gastrointestinal  
63        symptoms in addition to pulmonary complications. Prior work has shown that the intestinal  
64        microbiome correlates with health outcomes in CF, particularly in children. Recently approved  
65        treatments for CF, CFTR modulators, are anticipated to substantially improve the care of  
66        patients with CF and extend their lifespans. Here, we study the intestinal microbiome of children  
67        with CF before and after the CFTR modulator, ELX/TEZ/IVA. We identify promising  
68        improvements in microbiome diversity, reduced measures of intestinal inflammation, and  
69        reduced antibiotic resistance genes. We present specific bacterial taxa and protein groups  
70        which change following ELX/TEZ/IVA. These results will inform future mechanistic studies to  
71        understand the microbial improvements associated with CFTR modulator treatment. This study  
72        demonstrates how the microbiome can change in response to a targeted medication that  
73        corrects a genetic disease.

74

75

76

77

78

79

## 80 1. INTRODUCTION

81 Cystic fibrosis (CF) is an autosomal recessive disease affecting a total of 40,000 individuals in  
82 the United States (1). CF is caused by mutations in the CF transmembrane conductance  
83 regulator (*CFTR*) gene resulting in decreased epithelial transport of chloride and bicarbonate  
84 ions. These mutations result in mucus obstruction which presents with severe multi-organ  
85 dysfunction, principally affecting the airways and gastrointestinal tract (2–5). The gastrointestinal  
86 complications include malnutrition, dysmotility, and hepatopancreaticobiliary disease (2).  
87 Importantly, nutritional status and intestinal microbiome abnormalities in children with CF have  
88 been linked to growth failure, disease progression, and risk of future lung transplantation (6–11).

89 Multiple studies have demonstrated differences in the intestinal microbiome of patients with  
90 CF when compared to healthy controls (8, 12–15). The CF intestinal microbiome is notably  
91 inflammatory and associated with higher rates of inflammatory bowel disease (IBD) and colon  
92 cancer (16–20). In infants with CF, delayed intestinal microbiome maturation has been shown to  
93 influence linear growth and immune programming (8, 21). Among the most striking differences  
94 compared to healthy controls is the abundance of Proteobacteria, specifically *Escherichia coli*,  
95 and concomitant decrease in Bacteroidetes in infants with CF (8, 12, 22–24). Furthermore,  
96 during acute CF pulmonary exacerbations, the intestinal microbiome is distinguishable from  
97 periods of respiratory stability (15, 21, 25). Respiratory pathogens, such as *Staphylococcus*  
98 *aureus*, can also be detected in CF stool samples (22, 26).

99 Over the past decade, small molecule therapies which address the primary defect in the  
100 CFTR protein and rescue CFTR function in select genotypes have been developed. These  
101 “CFTR modulators” have dramatically changed the trajectory of CF patient care, yielding  
102 remarkable improvements in lung function, growth, and projected lifespan (27). The most recent  
103 CFTR modulator formulation approved for clinical care, elexacaftor-tezacaftor-ivacaftor  
104 (ELX/TEZ/IVA), includes two CFTR correctors (ELX & IVA) and one CFTR potentiator (TEZ )  
105 (28). The approval of ELX/TEZ/IVA is anticipated to be the most important advancement in CF  
106 therapy since *CFTR* was identified over 30 years ago (27, 28).

107 Given the progressive nature of CF, initiation of therapy in early childhood is critical to stall  
108 disease progression. ELX/TEZ/IVA was approved by the FDA for pediatric patients in 2019  
109 (ages 12 years and older), 2021 (ages 6-11 years old), and 2023 (ages 2-5 years old). The  
110 impact of ELX/TEZ/IVA on clinical outcomes and the intestinal microbiome in children with CF  
111 requires targeted study. To date, studies examining the effects of CFTR modulators on the  
112 intestinal microbiome have been limited by the use of single modulator formulations or small

113 cohort sizes (29–31). Importantly, no studies have characterized the effect of ELX/TEZ/IVA on  
114 the intestinal microbiome of children with CF. We therefore undertook a longitudinal study to  
115 identify changes in clinical outcomes and the intestinal microbiomes of pediatric patients  
116 following the initiation of ELX/TEZ/IVA. To our knowledge, this study represents the first  
117 comprehensive study of the highly effective CFTR modulator formulation ELX/TEZ/IVA on the  
118 intestinal microbiome of children with CF.

119

## 120 **2. METHODS**

### 121 **2.1 Recruitment of Subjects**

122 Pediatric patients with a diagnosis of CF at Monroe Carell Jr. Children's Hospital at Vanderbilt  
123 (MCJCHV) were recruited beginning in July 2017 with follow-up until October 2022. Patients  
124 with the Phe508 CFTR mutation who were deemed eligible for ELX/TEZ/IVA by their  
125 pulmonologist were eligible for this study. Patients previously treated with other CFTR  
126 modulator regimens were permitted. Patients with pre-existing non-CF gastrointestinal disease  
127 were excluded. A total of 39 participants were recruited (Table 1). Informed consent was  
128 obtained from parental guardians, and assent was obtained from pediatric subjects in  
129 accordance with institutional research ethics guidelines. This study was approved by the  
130 MCJCHV Institutional Review Board (IRB # 200396). The lead investigators of this study had no  
131 direct role in the patients' routine medical care. All study data were stored in a Research  
132 Electronic Data Capture (REDCap) database per institutional guidelines (32).

133

### 134 **2.2 Study Timepoints**

135 Our analysis included stool samples from up to four timepoints per patient: two timepoints  
136 before ELX treatment (T1 & T2) and two timepoints after initiating ELX/TEZ/IVA (T3 & T4) (Fig.  
137 1B). For clinical outcomes, data was either analyzed by individual timepoints (T1-T4) or time  
138 points were combined for pre-ELX/TEZ/IVA samples (T1 & T2 combined) and post-ELX-  
139 TEZ/IVA samples (T3 & T4 combined). Analysis of individual timepoints permitted assessment  
140 of additional differences between the 6 to 12-month periods after ELX/TEZ/IVA initiation. For  
141 microbiome comparisons, analysis was based on combined pre-ELX/TEZ/IVA samples (T1 &  
142 T2) and post-ELX-TEZ/IVA samples (T3 & T4).

143

### 144 **2.3 Stool Sample Collection and DNA Extraction**

145 Stool samples were collected prior to ELX/TEZ/IVA initiation, either through targeted collection  
146 as part of this study or from our center's biobank of CF stool samples (33, 34). Subsequent stool

147 samples were collected at approximately 6- and 12-month intervals after initiation of  
148 ELX/TEZ/IVA (Fig. 1A). Fecal samples were collected in sterile collection cups and refrigerated  
149 until transport to the laboratory. Patients who were unable to provide a stool sample in clinic  
150 were provided with an OMNIgene®•GUT stool collection kit for at home collection and  
151 stabilization, returned via overnight shipping, and stored according to manufacturer  
152 specifications. Aliquots of stool samples were aseptically aliquoted into cryovials in a laminar  
153 flow biosafety cabinet to minimize aerosols and stored at -80°C until processing. Percent  
154 predicted forced expiratory volume in one second (ppFEV<sub>1</sub>) values were obtained in the  
155 outpatient setting at the time of stool sample collection; the highest spirometry value of three  
156 attempts was recorded. Clinical data including body mass index (BMI, percentiles), percentage  
157 predicted forced expiratory volume in 1 second (ppFEV<sub>1</sub>), medications, and laboratory values  
158 were recorded for visits when a stool sample was collected. Total DNA was extracted from 114  
159 stool samples using QIAamp PowerFecal Pro DNA Kits according to the manufacturer's  
160 instructions. Bead beating for efficient lysis was conducted for 10 minutes. All steps, excluding  
161 bead beating and centrifugation, were conducted in a laminar flow biosafety cabinet. No human  
162 DNA depletion or enrichment of microbial DNA was performed. DNA yield was estimated by  
163 spectrophotometry (NanoDrop™2000c) in parallel with ensuring satisfactory A260/A280 ratio for  
164 DNA purity.

165

#### 166 **2.4 Fecal Calprotectin Measurements**

167 Fecal calprotectin was measured using the Calprotectin ELISA Assay Kit (Eagle Biosciences).  
168 Duplicate portions of stool (50-100mg) were weighed and processed according to the  
169 manufacturer's instructions. Absorbance was measured with a SpectraMax® i3x (Molecular  
170 Devices). Fecal calprotectin (µg/g feces) was calculated using a 7-point standard curve. The  
171 assay's reported normal cut-off is <43.2 µg/g.

172

#### 173 **2.5 Shotgun Metagenomic Sequencing**

174 Sequencing libraries were prepared using Illumina® reagents as described elsewhere (35).  
175 Pooled libraries were sequenced on NextSeq2000 to generate 150-bp paired-end reads. An  
176 average of 13.9 million reads were produced per sample (range 9.1 to 30.1 million). Sequencing  
177 adaptors and low-quality sequences were trimmed with fastq-mcf from ea-utils-1.1.2.779 using  
178 default parameters (Supplementary Methods) (36).

179

#### 180 **2.6 Taxonomic and Functional Profiling of Metagenomic Sequence Data**

181 Species abundances were determined with MetaPhlan4 following read alignment to the  
182 MetaPhlan4 database (37). Diversity metrics were calculated with the vegan R package (38)  
183 and plotted with ggplot2. A weighted UniFrac distance matrix was constructed with the  
184 MetaPhlan R script “calculate\_unifrac”. Functional profiling was conducted with HUMAnN 3.0  
185 with mapping to UniRef90 gene-families and MetaCyc metabolic pathways (39–41). UniRef90  
186 gene-families were reformatted into KEGG orthology (KO) groups using the HUMAnN command  
187 “humann\_regroup\_table”. In total, we identified 722 species, 526 MetaCyc pathways, and 8634  
188 distinct KO groups annotations in the 114 samples. All functional annotations were normalized  
189 using the HUMAnN command “humann\_renorm\_table --units cpm”. Antibiotic resistance genes  
190 were identified by ShortBRED (42) with the reference Comprehensive Antibiotic Resistance  
191 Database (CARD version 2017) (43). ARG abundance was calculated as reads per kilobase of  
192 reference sequence per million sample reads (RPKM).

193

## 194 **2.7 Microbial Dysbiosis Index**

195 The Microbial Dysbiosis Index (MD-index) was calculated as the log<sub>10</sub> of the ratio of the relative  
196 abundance of taxa which were previously positively and negatively associated with newly  
197 diagnosed pediatric Crohn’s disease (44). Specifically, the numerator includes  
198 *Enterobacteriaceae*, *Pasteurellaceae*, *Fusobacteriaceae*, *Neisseriaceae*, *Veillonellaceae*,  
199 *Gemellaceae*; the denominator includes *Bacteroidales*, *Clostridiales* (excluding *Veillonellaceae*),  
200 *Erysipelotrichaceae*, and *Bifidobacteriaceae*. Higher indices correspond to a greater  
201 inflammatory taxonomic profile. The MD-index has been previously applied to stool samples of  
202 children with CF (14, 45).

203

## 204 **2.8 Differential Abundance Testing**

205 We used MaAsLin2 (Microbiome Multivariable Associations with Linear Models, Maaslin2 R  
206 package) to identify differentially abundant features (46). We included ELX/TEZ/IVA, age, and  
207 recent antibiotic exposure as fixed effects. Subject ID was specified as a random effect due to  
208 multiple samples from the same subject. Species, KEGG orthologs, and MetaCyc pathways  
209 detected at least 10% of samples were tested (i.e., prevalence = 0.1); no minimum abundance  
210 was specified. Abundances were log transformed within the MaAsLin2 function. The general  
211 linear “LM” model was used. MaAsLin2 coefficients are equivalent to log<sub>2</sub>(FoldChange). The  
212 Benjamini-Hochberg procedure was used to correct P values, and corrected P values are  
213 reported as False Discovery Rates (FDR).

214

## 215 **2.9 Statistical Analyses**

216 Statistical analyses were conducted using GraphPad Prism 9 and R (version 4.2.1) software.  
217 Details of the statistical tests used and the significance thresholds are presented in the figure  
218 legends. All box-plot graphs are defined as: center line—median; box limits—upper and lower  
219 quartiles; whiskers—1.5× interquartile range.

## 221 **2.10 Reproducibility and Data Availability**

222 The results can be reproduced using raw sequence data that are available on NCBI-Genbank  
223 databases under BioProject PRJNA948536 or using processed data in the Supplementary  
224 Dataset 1. Bioinformatic code is available within the repository [https://github.com/reaset41/CF-](https://github.com/reaset41/CF-GI-Microbiome-ELX-TEZ-IVA)  
225 [GI-Microbiome-ELX-TEZ-IVA](https://github.com/reaset41/CF-GI-Microbiome-ELX-TEZ-IVA).

## 227 **3. RESULTS**

### 228 **3.1 Study Cohort and Stool Sample Collection**

229 Stool samples were collected from a total of 39 children with CF (Table 1). The median  
230 (IQR) age of participants at the time of ELX/TEZ/IVA initiation was 9.86 years old (8.87, 12.15)  
231 and 53.4% were male. Of these, 35.9% (14/39 subjects) had CFTR modulator use (at any time)  
232 before ELX/TEZ/IVA. Patients provided an average of 2.92 stool samples with all patients  
233 providing at least one stool sample prior to starting ELX/TEZ/IVA (T1 median= 33.6 months  
234 before ELX/TEZ/IVA initiation, IQR 28.6, 36.7 months and T2 median=0.64 months before  
235 ELX/TEZ/IVA initiation, IQR 0.13, 2.2 months). Subsequent stool samples were collected at  
236 approximately 6- and 12-month intervals (T3 median=5.97 months, IQR 5.38, 6.92 months and  
237 T4 median=12.39 months, IQR 11.1, 13.1 months). There was a total of 114 stool samples with  
238 53 samples before ELX/TEZ/IVA therapy and 61 samples after ELX/TEZ/IVA treatment (Fig. 1A  
239 & S2). Of the 53 samples collected pre-ELX/TEZ/IVA, 8 samples (15%) were collected while the  
240 patient was receiving an alternative CFTR modulator (Supplementary Dataset 1).

### 242 **3.2 Clinical Improvement after ELX/TEZ/IVA**

243 To determine our cohort's clinical response to ELX/TEZ/IVA, we compared clinical  
244 metrics from before and after ELX/TEZ/IVA initiation. Both BMI percentile and ppFEV<sub>1</sub> increased  
245 in the timepoints after ELX/TEZ/IVA compared to pre-ELX/TEZ/IVA timepoints (Fig. 1C-D &  
246 S1A-B). Median BMI percentile increased from the 54<sup>th</sup> percentile to the 67<sup>th</sup> percentile after  
247 ELX/TEZ/IVA (Fig. 1D). Likewise, there was a mean change in ppFEV<sub>1</sub> of 12.3 percentage  
248 points (95% CI 6.7-17.8) before and after ELX/TEZ/IVA (Fig. 1C). Between 6- and 12-months

249 after ELX/TEZ/IVA, there was no further significant improvement in either BMI or ppFEV<sub>1</sub> (Fig.  
250 S1A-B, T3 & T4). Consistent with increased BMI, weight percentile increased after ELX/TEZ/IVA  
251 (Fig. S1C). Height percentile increased between T2 and both T3 and T4 (Fig. S1D, P=0.013,  
252 P=0.026, respectively), though not between T1 and T3 & T4. Total antibiotic days per patient  
253 were aggregated and decreased from a median of 22.5 days per 6-months before ELX/TEZ/IVA  
254 to 0 antibiotic days per 6-months after ELX/TEZ/IVA (Fig. 1E, P<0.0001).

255

### 256 **3.3 Microbiome Diversity Increases After ELX/TEZ/IVA**

257 From shotgun metagenomic sequencing on 114 stool samples, we compared measures  
258 of microbiome taxonomy and diversity. In contrast to previously published CF microbiome  
259 datasets of infants (8, 22), our dataset of older children was dominated by the phylum  
260 Firmicutes with minimal Proteobacteria (Fig. 2A and Supplementary Dataset 1). Alpha diversity,  
261 as measured by the Shannon index and richness (observed species), significantly increased  
262 following ELX/TEZ/IVA (Fig. 2B-C, P=0.021 and P=0.026, respectively). The number of species  
263 observed increased from a median (IQR) of 83 (62, 115) species before ELX/TEZ/IVA to 109  
264 (82,125) species after ELX/TEZ/IVA (Fig. 2B). The cumulative increases in alpha diversity were  
265 not significantly different when comparing between the four timepoints individually (Fig. S2A-B),  
266 and there were no differences in overall community composition (beta-diversity) before and after  
267 ELX/TEZ/IVA (Fig. S2C-D).

268 To determine the effect of prior CFTR modulator treatment besides ELX/TEZ/IVA, we  
269 compared diversity metrics between modulator naïve samples (samples=45) and samples  
270 collected while subjects were receiving another CFTR modulator (samples=8) before  
271 ELX/TEZ/IVA. Samples collected while subjects were receiving another CFTR modulator had  
272 similar diversity to modulator naïve samples (Fig. S3A-B). Following ELX/TEZ/IVA, samples  
273 from subjects who had previously received another modulator (samples=20) had similar  
274 improvements in microbiome diversity to samples from subjects who had not previously  
275 received another modulator (samples=41), indicating that the residual effects of another  
276 modulator did not influence microbiome diversity improvement on ELX/TEZ/IVA (Fig. S3C-D).

277 To determine the influence of antibiotic exposure on microbiome diversity measures  
278 regardless of ELX/TEZ/IVA status, we categorized patient stool samples as having received  
279 antibiotics within the six-months prior to stool sample collection (samples=62) or no antibiotic  
280 receipt (samples=52). Recent antibiotic exposure significantly impacted alpha diversity  
281 measures reducing Shannon diversity and richness (Fig. 2D-E). Likewise, population structure



282 (beta-diversity) was significantly different between samples with and without recent antibiotic  
283 exposure (Fig. S2E, permutational multivariate analysis of variance [PERMANOVA]=0.003).

284

### 285 **3.4 Microbiome Encoded Antibiotic Resistance Genes Decrease After ELX/TEZ/IVA**

286 As discussed above, patients required far fewer antibiotics after starting ELX/TEZ/IVA  
287 (Fig. 1E & S4A). Since the intestinal microbiome is a reservoir of antibiotic resistant genes  
288 (ARGs) (47), we compared the number and type of intestinal ARGs before and after  
289 ELX/TEZ/IVA initiation. Across the 114 samples, we detected a total of 309 unique ARGs. The  
290 median number of unique ARGs nominally decreased from a median 86 ARGs (IQR 40, 96)  
291 before ELX/TEZ/IVA to a median 68 ARGs (IQR 38, 90) after ELX/TEZ/IVA (Fig. S4B, P=0.31).  
292 ARG abundance decreased from a median of 1180 RPKM (IQR 815.4, 1761.1) to 829 RPKM  
293 (IQR 460.5, 1299.0) (Fig. 3A, P=0.0097) though this effect was likely mediated by reduced  
294 antibiotic use.

295 Next, we aggregated the relative abundance of ARGs by antibiotic class to which they  
296 confer resistance (Fig. 3B). The abundance of ARGs conferring resistance to peptide antibiotics  
297 and ungrouped antibiotics (“Other”) significantly decreased after ELX/TEZ/IVA (Fig. 3B & S4C-  
298 E, P=0.012, P=0.022 respectively). The most prevalent antibiotics within the peptide ARG class  
299 included *arnA* (samples=72/114), *yojI* (samples=71/114), *pmrF* (samples=74/114) and *pmrC*  
300 (samples=71/114). *arnA*, *pmrF* and *pmrC* modify Lipid A on bacterial cells to repel cationic  
301 peptide antibiotics, whereas *yojI* is a peptide efflux pump. The most prevalent ARGs within the  
302 “Other” group were *fabI* (samples=84/114), *gadE* (samples=78/114), and EF-Tu mutations  
303 (samples=75/114). These ARGs or mutations confer resistance to isoniazid/disinfecting agents  
304 (*fabI*), acid resistance and efflux pump (*gadE*), and elfamycin (EF-Tu). Despite being the most  
305 prevalent, none of these ARGs were independently altered in abundance following  
306 ELX/TEZ/IVA (Fig. S4D & S4F).

307

### 308 **3.5 Alterations to Specific Bacterial Taxa Following ELX/TEZ/IVA**

309 To determine whether specific bacterial taxa change following ELX/TEZ/IVA treatment,  
310 we used MaAsLin2 (Microbiome Multivariable Associations with Linear Models) to identify  
311 differentially abundant microbial taxa (46). No phyla were differentially abundant following  
312 ELX/TEZ/IVA (Fig. 2A & Table S4). At a granular taxonomic level, seventeen species were  
313 differentially abundant between samples before and after ELX/TEZ/IVA (FDR<0.1, Fig. 4A and  
314 Table S3), with eleven species increasing in abundance after ELX/TEZ/IVA, and six species  
315 decreasing. The three species with the lowest FDR and, therefore, highest reliability were

316 *Butyricoccus* SGB14985, *S. aureus*, and *Roseburia faecis* (Fig. 4A-B). *Butyricoccus*  
317 SGB14985, an uncultivated species, was decreased in abundance following ELX/TEZ/IVA (fold  
318 change 0.16, FDR=0.022). *Roseburia faecis* was increased in abundance following  
319 ELX/TEZ/IVA (fold change 7.35, FDR=0.025) and negatively correlated with recent antibiotic  
320 exposure (Fig. S5A, fold change 0.20, FDR=0.086). The intestinal tract has immunological  
321 cross-talk between the separate but similarly structured mucosal environment of the lung,  
322 deemed the gut-lung axis (20). Since the intestinal tract can harbor similar respiratory  
323 pathogens in patients with CF (15, 48, 49), we performed focused analysis of CF pathogens. *S.*  
324 *aureus*, the predominant respiratory pathogen in children with CF (50), was decreased in  
325 abundance after ELX/TEZ/IVA (Fig. 4A-B, fold change 0.40, FDR=0.042). Other members of the  
326 respiratory microbiota which are frequently detected in the intestines (14, 15)—specifically the  
327 genera *Haemophilus*, *Prevotella*, *Streptococcus*, *Veillonella*—did not significantly change after  
328 ELX/TEZ/IVA initiation (Fig. S5B). *Pseudomonas aeruginosa*, an additional respiratory pathogen  
329 of importance in CF, was detected in only two of the 114 stool samples. Furthermore, fungal  
330 taxa were only identified in 8/114 samples (Supplementary Dataset 1).

331

### 332 **3.6 Intestinal Inflammation Decreases After ELX/TEZ/IVA**

333 Fecal calprotectin was measured across the four timepoints and markedly decreased  
334 following ELX/TEZ/IVA (Fig. 5A & S5A). Overall, mean fecal calprotectin decreased from 109  
335  $\mu\text{g/g}$  before ELX/TEZ/IVA to 44.8  $\mu\text{g/g}$  for a mean decrease of 64.2  $\mu\text{g/g}$  (95% CI -16.1, -112.3,  
336 Fig. 5A). We then computed the microbial dysbiosis index (MD-index), a ratio of bacterial taxa  
337 positively and negatively associated with newly diagnosed pediatric Crohn's disease, to assess  
338 the relationship between intestinal inflammation and specific microbial signatures (44). We  
339 noted a nominal reduction in the MD-index following ELX/TEZ/IVA (Fig. 5B,  $P=0.068$ ), which  
340 was less pronounced when comparing samples from patients with recent antibiotic exposure  
341 and those without (Fig. 5C,  $P=0.77$ ).

342

### 343 **3.7 Microbiome Functional Changes Reveal Specific Disease-Relevant Changes**

344 From the 114 stool samples, alignment of sequencing reads to known microbial proteins and  
345 pathways identified 8634 KEGG orthology (KO) protein groups and 526 MetaCyc metabolic  
346 pathways, consistent with prior studies of the intestinal microbiota (51). There were 249 KO  
347 groups differentially abundant with respect to ELX/TEZ/IVA use (MaAsLin2 FDR<0.25, Fig. 5D  
348 & Table S6). Strikingly, a common thread among differentially abundant KO groups was a  
349 decreased abundance of genes encoding oxidative phosphorylation functions following

350 ELX/TEZ/IVA (Fig. 5D). Seven of the top 10 most differentially abundant KO groups were  
351 components of the electron transport chain (Fig. 5D & S5B and Table S7) and included NADH-  
352 ubiquinone oxidoreductases (e.g., K03883, K03881, K03884, & K03880), F-type ATPase  
353 subunits (e.g., K02125), and cytochrome c oxidase subunits (e.g., K02262, K02261, & K02256).  
354 The taxa contributing to oxidative phosphorylation KO groups were not consistently annotated  
355 by HUMAnN (Fig. S6C and Table S10). This indicates that a specific taxonomic signature was  
356 not responsible for the reduced abundance of oxidative phosphorylation KO groups (Fig. S6C).  
357 These results were corroborated by MaAsLin2 differential abundance testing of MetaCyc  
358 pathways. Sixty-four MetaCyc pathways were differentially abundant with respect to  
359 ELX/TEZ/IVA use (MaAsLin2 FDR<0.25, Fig. 5E & S7, Table S9). Two of these pathways  
360 corresponded to aerobic respiration (PWY-3781 and PWY-7279). Differential abundance of  
361 anaerobic energy metabolism pathways showed discordant results with one pathway increased  
362 in abundance following ELX/TEZ/IVA (PWY-7383), and two pathways decreased in abundance  
363 (PWY-7389 and PWY-7384) following ELX/TEZ/IVA (Fig. S7 and Table S9). Thirteen amino  
364 acid biosynthesis pathways were universally prevalent in all stool samples (114/114) and  
365 significantly increased in abundance following ELX/TEZ/IVA (Fig. 5E and Table S9, FDR<0.25).  
366 This indicates increased biosynthetic capacity of the intestinal microbiome following  
367 ELX/TEZ/IVA.

368 Furthermore, multiple pathways related to nucleobase and nucleotide metabolism were  
369 differentially abundant following ELX/TEZ/IVA. Pyrimidine deoxyribonucleotide biosynthesis  
370 pathways were reduced in abundance following ELX/TEZ/IVA (PWY-7184 & PWY-6545)  
371 whereas a pyrimidine ribonucleotides biosynthesis pathway was increased in abundance  
372 (PWY0-162, Fig.S7 and Table S9). While these general pyrimidine deoxyribonucleotide  
373 biosynthesis pathways were reduced in abundance, specific pathways for thiamine biosynthesis  
374 (PWY-7357) and two uridine-monophosphate biosynthesis pathways (PWY-7790 & PWY-7791)  
375 were significantly increased in abundance following ELX/TEZ/IVA. An anaerobic pathway for  
376 purine degradation was increased in abundance following ELX/TEZ/IVA (P164-PWY). Three  
377 pathways related to allantoin degradation were significantly reduced in abundance following  
378 ELX/TEZ/IVA (PWY-5692, PWY0-41 & URDEGR-PWY, Fig. S7 and Table S9).

379 Another intriguing observation was the reduced abundance of KO groups involved in acid  
380 tolerance and transport following ELX/TEZ/IVA (Fig. 5D). KO groups involved in organic acid  
381 transport (e.g., K03290 & K23016) and proton-symporters (e.g., K11102 & K03459) were  
382 reduced in abundance following ELX/TEZ/IVA. Likewise, an acidity-responsive transcriptional

383 regulator (K03765, *cadC*) was decreased in abundance following ELX/TEZ/IVA (Fig. 5D and  
384 Table S7, fold change 0.42, FDR=0.27).

385

#### 386 4. DISCUSSION

387 ELX/TEZ/IVA has changed the trajectory of CF patient care and dramatically improved  
388 clinical outcomes. Nutritional status and components of the intestinal microbiome are strong  
389 predictors of future clinical outcomes, particularly in children with CF (6–8). We therefore sought  
390 to determine the effects of ELX/TEZ/IVA on intestinal inflammation and the intestinal  
391 microbiome in children with CF. Herein, we present a comprehensive longitudinal  
392 characterization of the intestinal microbiome in children with CF treated with ELX/TEZ/IVA. We  
393 identified widespread changes to the intestinal microbiome after ELX/TEZ/IVA including  
394 taxonomic composition, reduced carriage of ARGs, and altered microbiota metabolic functions.

395 Although randomized controlled trials demonstrated that ELX/TEZ/IVA was safe and  
396 effective, there are limited post-approval clinical data, particularly in children over two years old  
397 (52–56). BMI and ppFEV<sub>1</sub> are useful markers of clinical response to CFTR modulator treatment  
398 in children (57). Our cohort demonstrated significant improvement in ppFEV<sub>1</sub> and BMI percentile  
399 within six-months of starting ELX/TEZ/IVA, with no additional differences at later time points  
400 (Fig. S1A-B). This is consistent with prior clinical trial and real-world data showing the greatest  
401 impact on nutritional status and anthropometric parameters immediately after ELX/TEX/IVA  
402 therapy initiation with subsequent plateau without regression in children (52, 56, 58). Prior  
403 baseline BMI, particularly underweight status, has been predicted to be a major determinant of  
404 increase in weight gain in patients with CF treated with ELX/TEZ/IVA (59). Furthermore,  
405 between the timepoint immediately before ELX/TEZ/IVA initiation (T2) and post-ELX/TEZ/IVA  
406 timepoints (T3 & T4), there was a significant increase in height percentile (Fig. S1D). This  
407 suggests that CFTR modulator therapy may improve linear growth in children with CF. In sum,  
408 these results support the clinical responsiveness of children with CF to ELX/TEZ/IVA.

409 The gastrointestinal microbiome influences whole-body physiology. CF intestinal  
410 microbiome abnormalities begin in infancy, diverging from healthy controls soon after birth (8,  
411 14, 15, 21–23). Intriguingly, the microbiome of patients with CF resembles that of patients with  
412 IBD, a group with a characteristically perturbed intestinal microbiome (12, 45, 60). Considerable  
413 prior research has characterized the development of the CF intestinal microbiome in infants (8,  
414 13–15, 21–23). Less information exists about the CF intestinal microbiome in children and  
415 adolescents (13, 24, 26, 61–65). A consistent finding is that high levels of the phylum  
416 Proteobacteria, specifically the species *Escherichia coli*, define the infant CF intestinal

417 microbiome (12, 22). The abundance of Proteobacteria decreases with age in young children  
418 with CF (14, 22). In our dataset of older children with CF, Proteobacteria comprised a minority of  
419 the identified bacteria (Fig. 2A). In turn, the relative abundance of the phylum Firmicutes is  
420 increased in our cohort, likely representing a more stable “adult-like” microbiome.

421 Direct comparison of our results to studies containing healthy controls is difficult given  
422 different sampling and sequencing methodologies. Notably, although our study identified subtle  
423 changes in the intestinal microbiome after initiation of ELX/TEZ/IVA in children with CF, the  
424 post-ELX/TEZ/IVA intestinal microbiome remains significantly altered from what has been  
425 described in healthy children. Compared to healthy children, the intestinal microbiome of  
426 children with CF is delayed in development and exhibits decreased microbial diversity relative to  
427 healthy controls throughout childhood and adolescence (22, 24, 63). Among the most consistent  
428 differences between healthy controls and patients with CF is reduced abundance of the phylum  
429 Bacteroidetes in patients with CF (13, 20, 61, 63, 66). In our dataset, Bacteroidetes remained  
430 depleted post-ELX/TEZ/IVA (Fig. 2A and Table S4). Likewise, Shannon diversity remained  
431 below that of similarly-aged healthy controls (24, 63), as discussed henceforth.

432 In our cohort, alpha diversity, as measured by the Shannon index and richness (observed  
433 species), significantly increased following ELX/TEZ/IVA (Fig. 2B-C). These results demonstrate  
434 modest but statistically significant differences in an older cohort of children with CF, whose  
435 microbiome resembles that of more of a stable “adult-like” microbiome. The difference in the  
436 median Shannon diversity was increased 0.29 after ELX/TEZ/IVA (Fig. 2B). In contrast, a  
437 similarly aged cohort of children with CF exhibited a median ~1.0 reduced Shannon index  
438 compared to healthy controls in the same study (24). Thus, while our cohort exhibited significant  
439 increases in Shannon diversity, it is unlikely that this magnitude of increase restores the  
440 diversity to that of similarly aged healthy controls. This is consistent with the notion that “adult-  
441 like” intestinal microbiota are remarkably stable and resilient to intervention (67–69). As CFTR  
442 modulator formulations are approved for younger children, particularly infants for whom the  
443 microbiome is still developing, studying the effects of CFTR modulators on the developing  
444 intestinal microbiome will be an important research endeavor and may show more substantial  
445 differences.

446 In children with CF, markers of intestinal inflammation correlate with growth failure (11, 24).  
447 Moreover, intestinal inflammation in patients with CF is linked to higher rates of IBD and  
448 colorectal cancer in patients with CF (16, 17, 70). Fecal calprotectin, a laboratory marker of  
449 intestinal inflammation (71–73), significantly decreased following ELX/TEZ/IVA (Fig. 5A),  
450 corroborating prior reports in the PROMISE and RECOVER cohorts (74, 75). Using a dysbiosis

451 index of bacterial taxa correlated with pediatric Crohn's disease (44), we identified that this  
452 dysbiosis index nominally decreased following ELX/TEZ/IVA initiation (Fig. 5B). The decrease in  
453 the median MD-index was 0.166 before and after ELX/TEZ/IVA. The median post-ELX/TEZ/IVA  
454 MD-index was lower (i.e. reduced inflammatory taxa) than that of healthy controls in the original  
455 publication describing the MD-index (44). This suggests that the magnitude of decrease in the  
456 MD-index in our study may be biologically meaningful. Furthermore, the difference between pre-  
457 and post-ELX/TEZ/IVA (Fig. 5B) was more pronounced than in samples with and without recent  
458 antibiotic exposure (Fig. 5C). This suggests that this effect may be specific to ELX/TEZ/IVA  
459 treatment, and not due to reduced antibiotic use. At the species level, the butyrate-producing  
460 species *Roseburia faecis* was significantly enriched following ELX/TEZ/IVA (Fig. 4A-B). Prior  
461 studies have identified *R. faecis* as reduced in abundance in patients with CF (20, 76–78). In  
462 parallel, we detected reduced abundance of genes involved in oxygen-dependent metabolism  
463 following ELX/TEZ/IVA (Fig. 5D-E). Intestinal inflammation is characterized by a shift towards  
464 oxygen-dependent microbiota metabolism, perpetuating a cycle of inflammatory damage (79–  
465 81). From multiple lines of evidence, our results suggest that ELX/TEZ/IVA reduces intestinal  
466 inflammation in children with CF.

467       Respiratory infections require frequent antibiotics in patients with CF. Some respiratory  
468 pathogens also colonize the intestinal tract and temporally correlate with respiratory colonization  
469 (15, 48, 49). *S. aureus* is among the first pathogens to colonize the respiratory tract and cause  
470 infections in children with CF (50). We detected reduced intestinal abundance of *S. aureus*  
471 following ELX/TEZ/IVA (Fig. 4A-B). Antibiotic exposure in patients with CF has been associated  
472 with increased intestinal carriage of antibiotic resistant bacteria compared to healthy controls  
473 which are a poor prognostic factor (82–84). Following ELX/TEZ/IVA, patients in our cohort  
474 required far fewer antibiotics (Fig. 1E). In turn, we detected reduced intestinal abundance of  
475 ARGs (Fig. 2E). These results indicate disease-relevant taxonomic changes to the intestinal  
476 microbiome following ELX/TEZ/IVA, as well as reduced ARGs.

477       The CFTR channel permits transepithelial movement of bicarbonate ( $\text{HCO}_3^-$ ) and  
478 chloride ( $\text{Cl}^-$ ) (5). Intestinal pH is lower in patients with CF due to the lack of neutralizing  
479 bicarbonate (85) yet increases with CFTR modulator treatment, consistent with increased CFTR  
480 activity in the intestinal tract (86). We observed a reduced abundance of microbial protein  
481 groups associated with acid tolerance (Fig. 5D), consistent with microbial adaptation to  
482 increased CFTR channel function in the intestines. These results display physiologically intuitive  
483 functional changes to the microbiome post-ELX/TEZ/IVA. As CFTR modulators become the

484 mainstay of treatment for CF, further research will be necessary to mechanistically describe the  
485 effects of CFTR modulators on gastrointestinal function.

486 Our study is strengthened by longitudinal sampling over a five-year period combined  
487 with the real-world use of ELX/TEZ/IVA. Using shotgun metagenomic sequencing, we  
488 comprehensively compared microbiota differences before and after ELX/TEZ/IVA. Sampling of  
489 the intestinal microbiome over extended periods will be important to uncover additional long-  
490 term improvements to the microbiome. Similarly, further research is necessary to delineate the  
491 effects of ELX/TEZ/IVA on the interconnected respiratory and intestinal microbiomes. Although  
492 our study was limited by the single-center focus, our cohort mirrors the overall CF pediatric  
493 population in clinical and demographic factors (Table 1). Our study lacks untreated CF controls  
494 or healthy controls, which would allow for additional comparisons.

495 In summary, our results indicate that the CFTR modulator ELX/TEZ/IVA alters the  
496 intestinal microbiome in children with CF. We identified taxonomic and functional changes to the  
497 intestinal microbiome that represent improvements to CF intestinal microbiome structure and  
498 function. Our results also support that CFTR modulators reduce intestinal inflammation in  
499 children with CF.

500

#### 501 **AUTHOR CONTRIBUTIONS (CRediT author statement)**

502 SAR: Investigation, Methodology, Data Curation, Formal analysis, Writing - Original Draft

503 RB: Conceptualization, Funding Acquisition, Investigation, Data Curation, Writing - Original Draft

504 AW: Investigation, Software

505 KP: Investigation

506 JS: Investigation

507 AGS: Supervision, Writing - Review & Editing

508 RFB: Supervision, Writing - Review & Editing

509 KME: Supervision, Writing - Review & Editing

510 SJS: Investigation, Data Curation, Software, Writing - Review & Editing

511 MH: Supervision, Writing - Review & Editing

512 MRN: Conceptualization, Funding Acquisition, Investigation, Supervision, Writing - Original Draft

513

#### 514 **ACKNOWLEDGEMENTS AND FUNDING**

515 We would like to express our sincere appreciation to the patients and their families who

516 enthusiastically participated in this study. We would like to thank our advanced practitioner and

517 nursing colleagues from the Pediatric Pulmonology clinic at the Monroe Carrell Jr. Children's

518 Hospital at Vanderbilt for their collegiality and assistance with this study. This work was  
519 supported, in part, by National Institutes of Health (NIH) grants T32DK007673 (RB),  
520 K23AI156132 (MRN), F30AI169748 (SAR), T32GM007347 (SAR), and P30DK089507 (SJS);  
521 the Cystic Fibrosis Foundation (SINGH19R0 to SJS) and the Thrasher Research Fund (RB and  
522 MRN).

523

## 524 **CONFLICTS OF INTERESTS**

525 All authors declare that they have no conflicts of interest relevant to this work.

526

## 527 **DATA AVAILABILITY**

528 All sequence data derived from this work are publicly available in NCBI-Genbank databases  
529 under BioProject PRJNA948536. All processed data and code used for bioinformatic analysis is  
530 available within the repository: <https://github.com/reaset41/CF-GI-Microbiome-ELX-TEZ-IVA>.

531

## 532 **AUTHOR ORCID IDs:**

533 SAR: 0000-0002-7791-1641

534 RB: 0000-0002-6689-5658

535 AW: 0000-0002-5202-1108

536 KP: 0000-0003-1454-6381

537 AGS: 0000-0002-5495-1237

538 RFB: 0000-0003-3632-4587

539 KME: 0000-0003-3912-9832

540 SJS: 0000-0001-8355-6992

541 MH: 0000-0003-4249-8997

542 MRN: 0000-0003-3941-5599

543

## 544 **REFERENCES**

- 545 1. 2022. CF Foundation Estimates Increase in CF Population. Cystic Fibrosis Foundation.  
546 <https://www.cff.org/news/2022-07/cf-foundation-estimates-increase-cf-population>.  
547 Retrieved 10 April 2023.
- 548 2. Moshiree B, Freeman AJ, Vu PT, Khan U, Ufret-Vincenty C, Heltshe SL, Goss CH,  
549 Schwarzenberg SJ, Freedman SD, Borowitz D, Sathe M. 2022. Multicenter prospective  
550 study showing a high gastrointestinal symptom burden in cystic fibrosis. *Journal of Cystic*  
551 *Fibrosis* <https://doi.org/10.1016/j.jcf.2022.10.006>.
- 552 3. De Lisle RC, Borowitz D. 2013. The cystic fibrosis intestine. *Cold Spring Harb Perspect*  
553 *Med* 3:1–18.
- 554 4. Kreda SM, Davis CW, Rose MC. 2012. CFTR, mucins, and mucus obstruction in cystic  
555 fibrosis. *Cold Spring Harb Perspect Med* 2.
- 556 5. Elborn JS. 2016. Cystic fibrosis. *The Lancet* 388:2519–2531.



- 557 6. Steinkamp G, Wiedemann B. 2002. Relationship between nutritional status and lung  
558 function in cystic fibrosis: Cross sectional and longitudinal analyses from the German CF  
559 quality assurance (CFQA) project. *Thorax* 57:596–601.
- 560 7. Ashkenazi M, Nathan N, Sarouk I, Aluma BEB, Dagan A, Bezalel Y, Keler S, Vilozni D,  
561 Efrati O. 2019. Nutritional Status in Childhood as a Prognostic Factor in Patients with  
562 Cystic Fibrosis. *Lung* <https://doi.org/10.1007/s00408-019-00218-3>.
- 563 8. Hayden HS, Eng A, Pope CE, Brittnacher MJ, Vo AT, Weiss EJ, Hager KR, Martin BD,  
564 Leung DH, Heltshe SL, Borenstein E, Miller SI, Hoffman LR. 2020. Fecal dysbiosis in  
565 infants with cystic fibrosis is associated with early linear growth failure. *Nat Med* 26:215–  
566 221.
- 567 9. Rogers GB, Carroll MP, Hoffman LR, Walker AW, Fine DA, Bruce KD. 2010.  
568 Comparing the microbiota of the cystic fibrosis lung and human gut. *Gut Microbes* 1:85–  
569 93.
- 570 10. Héry-arnaud G, Boutin S, Cuthbertson L, Elborn SJ, Tunney MM. 2019. The lung and gut  
571 microbiome: what has to be taken into consideration for cystic fibrosis? *Journal of*  
572 *Cystic Fibrosis* 18:13–21.
- 573 11. Dhaliwal J, Leach S, Katz T, Nahidi L, Pang T, Lee JM, Strachan R, Day AS, Jaffe A, Ooi  
574 CY. 2015. Intestinal inflammation and impact on growth in children with cystic fibrosis. *J*  
575 *Pediatr Gastroenterol Nutr* 60:521–526.
- 576 12. Hoffman LR, Pope CE, Hayden HS, Heltshe S, Levy R, McNamara S, Jacobs MA,  
577 Rohmer L, Radey M, Ramsey BW, Brittnacher MJ, Borenstein E, Miller SI. 2014.  
578 *Escherichia coli* dysbiosis correlates with gastrointestinal dysfunction in children with  
579 cystic fibrosis. *Clinical Infectious Diseases* 58:396–399.
- 580 13. Manor O, Levy R, Pope CE, Hayden HS, Brittnacher MJ, Carr R, Radey MC, Hager KR,  
581 Heltshe SL, Ramsey BW, Miller SI, Hoffman LR, Borenstein E. 2016. Metagenomic  
582 evidence for taxonomic dysbiosis and functional imbalance in the gastrointestinal tracts of  
583 children with cystic fibrosis. *Sci Rep* 6:1–9.
- 584 14. Price CE, Hampton TH, Valls RA, Barrack KE, O’Toole GA, Madan JC, Coker MO.  
585 2023. Development of the intestinal microbiome in cystic fibrosis in early life. *mSphere*  
586 <https://doi.org/10.1128/msphere.00046-23>.
- 587 15. Madan JC, Koestle DC, Stanton BA, Davidson L, Moulton LA, Housman ML, Moore JH,  
588 Guill MF, Morrison HG, Sogin ML, Hampton TH, Karagas MR, Palumbo PE, Foster JA,  
589 Hibberd PL, O’Toole GA. 2012. Serial analysis of the gut and respiratory microbiome in  
590 cystic fibrosis in infancy: Interaction between intestinal and respiratory tracts and impact  
591 of nutritional exposures. *mBio* 3.
- 592 16. Hadjiliadis D, Khoruts A, Zauber AG, Hempstead SE, Maisonneuve P, Lowenfels AB,  
593 Braid AL, Cullina J, Daggett A, Fink A, Gini A, Harron PF, Lansdorp-Vogelaar I,  
594 Lieberman D, Liou T, Lomas P, Marshall B, Meyer K, Rustgi A, Shaikat A, Sabadosa K.  
595 2018. Cystic Fibrosis Colorectal Cancer Screening Consensus Recommendations.  
596 *Gastroenterology* 154:736-745.e14.
- 597 17. Hegagi M, Aaron SD, James P, Goel R, Chatterjee A. 2017. Increased prevalence of  
598 colonic adenomas in patients with cystic fibrosis. *Journal of Cystic Fibrosis* 16:759–762.
- 599 18. Schwarzenberg SJ, Wielinski CL, Shamieh I, Carpenter BLM, Jessurun J, Weisdorf SA,  
600 Warwick WJ, Sharp HL. 1995. Cystic fibrosis-associated colitis and fibrosing  
601 colonopathy. *J Pediatr* 127:565–570.

- 602 19. Burton S, Hachem C, Abraham J. 2021. Luminal Gastrointestinal Manifestations of Cystic  
603 Fibrosis. *Curr Gastroenterol Rep* 23.
- 604 20. Price CE, O'Toole GA. 2021. The gut-lung axis in cystic Fibrosis. *J Bacteriol. American*  
605 *Society for Microbiology* <https://doi.org/10.1128/JB.00311-21>.
- 606 21. Antosca KM, Chernikova DA, Ruoff KL, Li K, Guill MF, MacKenzie TA, Dorman DB,  
607 Moulton LA, Williams MA, Aldrich BJ, Yuan IH, Karagas MR, O'Toole GA, Madan JC.  
608 2019. Altered Stool Microbiota of Infants with Cystic Fibrosis Shows Reduction in  
609 Genera Associated with Immune Programming. *J Bacteriol* 201:1–15.
- 610 22. Salerno P, Verster AJ, Valls RA, Barrack KE, Price CE, Madan JC, O'Toole GA, Ross  
611 BD. 2023. Persistent delay in maturation of the developing gut microbiota in infants with  
612 cystic fibrosis. *bioRxiv* <https://doi.org/10.1101/2023.05.02.539134>.
- 613 23. Kristensen M, Prevaes SMPJ, Kalkman G, Tramper-Stranders GA, Hasrat R, de Winter-  
614 de Groot KM, Janssens HM, Tiddens HA, van Westreenen M, Sanders EAM, Arets B,  
615 Keijser B, van der Ent CK, Bogaert D. 2020. Development of the gut microbiota in early  
616 life: The impact of cystic fibrosis and antibiotic treatment. *Journal of Cystic Fibrosis*  
617 19:553–561.
- 618 24. Coffey MJ, Nielsen S, Wemheuer B, Kaakoush NO, Garg M, Needham B, Pickford R, Ja  
619 A, Thomas T, Chee Y. Ooi. 2019. Gut Microbiota in Children With Cystic Fibrosis: A  
620 Taxonomic and Functional Dysbiosis. *Sci Rep* 9:1–14.
- 621 25. Hoen AG, Li J, Moulton LA, O'Toole GA, Housman ML, Koestler DC, Guill MF, Moore  
622 JH, Hibberd PL, Morrison HG, Sogin ML, Karagas MR, Madan JC. 2015. Associations  
623 between gut microbial colonization in early life and respiratory outcomes in cystic  
624 fibrosis. *Journal of Pediatrics* 167:138-147.e3.
- 625 26. Vernocchi P, Chierico F Del, Russo A, Majo F, Rossitto M, Valerio M, Casadei L, Storia  
626 A La, De Filippis F, Rizzo C, Manetti C, Paci P, Ercolini D, Marini F, Fiscarelli EV,  
627 Dallapiccola B, Lucidi V, Miccheli A, Putignani L. 2018. Gut microbiota signatures in  
628 cystic fibrosis: Loss of host CFTR function drives the microbiota enterophenotype. *PLoS*  
629 *One* 13:1–23.
- 630 27. Mahase E. 2019. Cystic fibrosis: Triple therapy shows promising results. *The BMJ*  
631 367:6347.
- 632 28. Collins FS. 2019. Realizing the Dream of Molecularly Targeted Therapies for Cystic  
633 Fibrosis. *New England Journal of Medicine* 381:1862–1863.
- 634 29. Ooi CY, Syed SA, Rossi L, Garg M, Needham B, Avolio J, Young K, Surette MG,  
635 Gonska T. 2018. Impact of CFTR modulation with Ivacaftor on Gut Microbiota and  
636 Intestinal Inflammation. *Sci Rep* 8:1–8.
- 637 30. Ronan NJ, Einarsson GG, Deane J, Fouhy F, Rea M, Hill C, Shanahan F. 2022.  
638 Modulation , microbiota and inflammation in the adult CF gut: A prospective study.  
639 *Journal of Cystic Fibrosis* <https://doi.org/10.1016/j.jcf.2022.06.002>.
- 640 31. Pope CE, Vo AT, Hayden HS, Weiss EJ, Durfey S, Mcnamara S, Ratjen A, Grogan B,  
641 Carter S, Nay L, Parsek M, Singh P, McKone E, Aitken M, Rosenfeld M, Hoffman L.  
642 2020. Changes in fecal microbiota with CFTR modulator therapy: A pilot study. *Journal*  
643 *of Cystic Fibrosis* <https://doi.org/10.1016/j.jcf.2020.12.002>.
- 644 32. Harris PA, Taylor R, Thielke R, Payne J, Gonzalez N, Conde JG. 2009. Research  
645 electronic data capture (REDCap)-A metadata-driven methodology and workflow process  
646 for providing translational research informatics support. *J Biomed Inform* 42:377–381.

- 647 33. Reasoner SA, Fazili IF, Bernard R, Parnell JM, Sokolow AG, Thomsen KF, Edwards KM,  
648 Brown RF, Nicholson MR. 2022. Prevalence, Risk Factors, and Sequelae of  
649 Asymptomatic *Clostridioides difficile* Colonization in Children with Cystic Fibrosis.  
650 *Journal of Cystic Fibrosis* <https://doi.org/10.1016/j.jcf.2022.12.014>.
- 651 34. Parnell JM, Fazili I, Bloch SC, Lacy DB, Garcia-Lopez VA, Bernard R, Skaar EP,  
652 Edwards KM, Nicholson MR. 2021. Two-step Testing for *Clostridioides Difficile* is  
653 Inadequate in Differentiating Infection From Colonization in Children. *J Pediatr*  
654 *Gastroenterol Nutr* 72:378–383.
- 655 35. Gaio D, Anantanawat K, To J, Liu M, Monahan L, Darling AE. 2022. Hackflex: Low-  
656 cost, high-throughput, Illumina Nextera Flex library construction. *Microb Genom* 8.
- 657 36. Aronesty E. 2011. ea-utils: Command-line tools for processing biological sequencing data.  
658 <https://github.com/ExpressionAnalysis/ea-utils>.
- 659 37. Blanco-Míguez A, Beghini F, Cumbo F, McIver LJ, Thompson KN, Zolfo M, Manghi P,  
660 Dubois L, Huang KD, Thomas AM, Nickols WA, Piccinno G, Piperni E, Punčochář M,  
661 Valles-Colomer M, Tett A, Giordano F, Davies R, Wolf J, Berry SE, Spector TD,  
662 Franzosa EA, Pasolli E, Asnicar F, Huttenhower C, Segata N. 2023. Extending and  
663 improving metagenomic taxonomic profiling with uncharacterized species using  
664 *MetaPhlAn 4*. *Nat Biotechnol* <https://doi.org/10.1038/s41587-023-01688-w>.
- 665 38. Dixon P. 2003. VEGAN, A Package of R Functions for Community Ecology. *Journal of*  
666 *Vegetation Science* 14:927–930.
- 667 39. Franzosa EA, McIver LJ, Rahnavaard G, Thompson LR, Schirmer M, Weingart G, Lipson  
668 KS, Knight R, Caporaso JG, Segata N, Huttenhower C. 2018. Species-level functional  
669 profiling of metagenomes and metatranscriptomes. *Nat Methods* 15:962–968.
- 670 40. Caspi R, Billington R, Keseler IM, Kothari A, Krummenacker M, Midford PE, Ong WK,  
671 Paley S, Subhraveti P, Karp PD. 2020. The MetaCyc database of metabolic pathways and  
672 enzymes—a 2019 update. *Nucleic Acids Res* 48:D455–D453.
- 673 41. Abubucker S, Segata N, Goll J, Schubert AM, Izard J, Cantarel BL, Rodriguez-Mueller B,  
674 Zucker J, Thiagarajan M, Henrissat B, White O, Kelley ST, Methé B, Schloss PD, Gevers  
675 D, Mitreva M, Huttenhower C. 2012. Metabolic reconstruction for metagenomic data and  
676 its application to the human microbiome. *PLoS Comput Biol* 8.
- 677 42. Kaminski J, Gibson MK, Franzosa EA, Segata N, Dantas G, Huttenhower C. 2015. High-  
678 Specificity Targeted Functional Profiling in Microbial Communities with ShortBRED.  
679 *PLoS Comput Biol* 11.
- 680 43. Jia B, Raphenya AR, Alcock B, Waglechner N, Guo P, Tsang KK, Lago BA, Dave BM,  
681 Pereira S, Sharma AN, Doshi S, Courtot M, Lo R, Williams LE, Frye JG, Elsayegh T,  
682 Sardar D, Westman EL, Pawlowski AC, Johnson TA, Brinkman FSL, Wright GD,  
683 McArthur AG. 2017. CARD 2017: Expansion and model-centric curation of the  
684 comprehensive antibiotic resistance database. *Nucleic Acids Res* 45:D566–D573.
- 685 44. Gevers D, Kugathasan S, Denson LA, Vázquez-Baeza Y, Van Treuren W, Ren B,  
686 Schwager E, Knights D, Song SJ, Yassour M, Morgan XC, Kostic AD, Luo C, González  
687 A, McDonald D, Haberman Y, Walters T, Baker S, Rosh J, Stephens M, Heyman M,  
688 Markowitz J, Baldassano R, Griffiths A, Sylvester F, Mack D, Kim S, Crandall W, Hyams  
689 J, Huttenhower C, Knight R, Xavier RJ. 2014. The treatment-naive microbiome in new-  
690 onset Crohn’s disease. *Cell Host Microbe* 15:382–392.
- 691 45. Enaud R, Hooks KB, Barre A, Barnetche T, Hubert C, Massot M, Bazin T, Clouzeau H,  
692 Bui S, Fayon M, Berger P, Lehours P, Bébéar C, Nikolski M, Lamireau T, Delhaes L,

- 693 Schaefferbeke T. 2019. Intestinal Inflammation in Children with Cystic Fibrosis Is  
694 Associated with Crohn’s-Like Microbiota Disturbances. *J Clin Med* 8:645.
- 695 46. Mallick H, Rahnavard A, McIver LJ, Ma S, Zhang Y, Nguyen LH, Tickle TL, Weingart  
696 G, Ren B, Schwager EH, Chatterjee S, Thompson KN, Wilkinson JE, Subramanian A, Lu  
697 Y, Waldron L, Paulson JN, Franzosa EA, Bravo HC, Huttenhower C. 2021. Multivariable  
698 association discovery in population-scale meta-omics studies. *PLoS Comput Biol* 17.
- 699 47. Salyers AA, Gupta A, Wang Y. 2004. Human intestinal bacteria as reservoirs for  
700 antibiotic resistance genes. *Trends Microbiol* <https://doi.org/10.1016/j.tim.2004.07.004>.
- 701 48. Wheatley RM, Caballero JD, van der Schalk TE, De Winter FHR, Shaw LP, Kapel N,  
702 Recanatini C, Timbermont L, Kluytmans J, Esser M, Lacombe A, Prat-Aymerich C, Oliver  
703 A, Kumar-Singh S, Malhotra-Kumar S, Craig MacLean R. 2022. Gut to lung translocation  
704 and antibiotic mediated selection shape the dynamics of *Pseudomonas aeruginosa* in an  
705 ICU patient. *Nat Commun* 13:6523.
- 706 49. Rogers GB, Carroll MP, Hoffman LR, Walker AW, Fine DA, Bruce KD. 2010.  
707 Comparing the microbiota of the cystic fibrosis lung and human gut. *Gut Microbes* 1:85–  
708 93.
- 709 50. Green HD, Jones AM. 2022. Managing Pulmonary Infection in Adults With Cystic  
710 Fibrosis: Adult Cystic Fibrosis Series. *Chest*. Elsevier Inc.  
711 <https://doi.org/10.1016/j.chest.2022.02.007>.
- 712 51. Beghini F, McIver LJ, Blanco-Míguez A, Dubois L, Asnicar F, Maharjan S, Mailyan A,  
713 Manghi P, Scholz M, Thomas AM, Valles-Colomer M, Weingart G, Zhang Y, Zolfo M,  
714 Huttenhower C, Franzosa EA, Segata N. 2021. Integrating taxonomic, functional, and  
715 strain-level profiling of diverse microbial communities with biobakery 3. *Elife* 10.
- 716 52. Mall MA, Brugha R, Gartner S, Legg J, Moeller A, Mondejar-Lopez P, Prais D, Pressler  
717 T, Ratjen F, Reix P, Robinson PD, Selvadurai H, Stehling F, Ahluwalia N, Arteaga-Solis  
718 E, Bruinsma BG, Jennings M, Moskowitz SM, Noel S, Tian S, Weinstock TG, Wu P,  
719 Wainwright CE, Davies JC. 2022. Efficacy and Safety of Elexacaftor/Tezacaftor/Ivacaftor  
720 in Children 6 Through 11 Years of Age with Cystic Fibrosis Heterozygous for F508del  
721 and a Minimal Function Mutation A Phase 3b, Randomized, Placebo-controlled Study.  
722 *Am J Respir Crit Care Med* 206:1361–1369.
- 723 53. Streibel C, Willers CC, Pusterla O, Bauman G, Stranzinger E, Brabant B, Bieri O, Curdy  
724 M, Bullo M, Frauchiger BS, Korten I, Krüger L, Casaulta C, Ratjen F, Latzin P, Kieninger  
725 E. 2023. Effects of elexacaftor/tezacaftor/ivacaftor therapy in children with cystic fibrosis  
726 – a comprehensive assessment using lung clearance index, spirometry, and functional and  
727 structural lung MRI. *Journal of Cystic Fibrosis* <https://doi.org/10.1016/j.jcf.2022.12.012>.
- 728 54. Jordan KD, Zemanick ET, Taylor-Cousar JL, Hoppe JE. 2023. Managing cystic fibrosis in  
729 children aged 6-11 yrs: a critical review of elexacaftor/tezacaftor/ivacaftor combination  
730 therapy. *Expert Rev Respir Med*. Taylor and Francis Ltd.  
731 <https://doi.org/10.1080/17476348.2023.2179989>.
- 732 55. Kapouni N, Moustaki M, Douros K, Loukou I. 2023. Efficacy and Safety of Elexacaftor-  
733 Tezacaftor-Ivacaftor in the Treatment of Cystic Fibrosis: A Systematic Review. *Children*  
734 10:554.
- 735 56. Wainwright C, McColley SA, McNally P, Powers M, Ratjen F, Rayment JH, Retsch-  
736 Bogart G, Roesch E, Ahluwalia N, Chin A, Chu C, Lu M, Menon P, Waltz D, Weinstock  
737 T, Zelazoski L, Davies JC, VX19-445-107 Study Group. 2023. Long-Term Safety and  
738 Efficacy of Elexacaftor/Tezacaftor/Ivacaftor in Children Aged  $\geq 6$  Years with Cystic

- 739 Fibrosis and At Least One F508del Allele: A Phase 3, Open-Label Clinical Trial. *Am J*  
740 *Respir Crit Care Med* <https://doi.org/10.1164/rccm.202301-0021OC>.
- 741 57. Cornet M, Robin G, Ciciriello F, Bihoue T, Marguet C, Roy V, Lebourgeois M,  
742 Chedeveigne F, Bonnel AS, Kelly M, Reix P, Lucidi V, Stoven V, Sermet-Gaudelus I.  
743 2022. Profiling the response to lumacaftor-ivacaftor in children with cystic between  
744 fibrosis and new insight from a French-Italian real-life cohort. *Pediatr Pulmonol*  
745 <https://doi.org/10.1002/ppul.26123>.
- 746 58. Appelt D, Steinkamp G, Sieber S, Ellemunter H. 2023. Early and sustained improvements  
747 of lung clearance index from two to sixteen weeks of elexacaftor/tezacaftor/ivacaftor  
748 therapy in patients with cystic fibrosis—a real world study. *Front Pharmacol* 14.
- 749 59. Gramegna A, Majo F, Alicandro G, Leonardi G, Cristiani L, Amati F, Contarini M,  
750 Aliberti S, Fiocchi AG, Blasi F. 2023. Heterogeneity of weight gain after initiation of  
751 Elexacaftor/Tezacaftor/Ivacaftor in people with cystic fibrosis. *Respir Res* 24.
- 752 60. Matamouros S, Hayden HS, Hager KR, Brittnacher MJ, Lachance K, Weiss EJ, Pope CE,  
753 Imhaus AF, McNally CP, Borenstein E, Hoffman LR, Miller SI. 2018. Adaptation of  
754 commensal proliferating *Escherichia coli* to the intestinal tract of young children with  
755 cystic fibrosis. *Proc Natl Acad Sci U S A* 115:1605–1610.
- 756 61. Freitas MB De, Addison E, Moreira M, Tomio C, Maria Y, Moreno F, Daltoe FP, Barbosa  
757 E, Neto NL, Buccigrossi V, Guarino A. 2018. Altered intestinal microbiota composition,  
758 antibiotic therapy and intestinal inflammation in children and adolescents with cystic  
759 fibrosis. *PLoS One* 13.
- 760 62. Duytschaever G, Huys G, Bekaert M, Boulanger L, De Boeck K, Vandamme P. 2013.  
761 Dysbiosis of bifidobacteria and *Clostridium* cluster XIVa in the cystic fibrosis fecal  
762 microbiota. *Journal of Cystic Fibrosis* 12:206–215.
- 763 63. Nielsen S, Needham B, Leach ST, Day AS, Jaffe A, Thomas T, Ooi CY. 2016. Disrupted  
764 progression of the intestinal microbiota with age in children with cystic fibrosis. *Sci Rep*  
765 6.
- 766 64. Debyser G, Mesuere B, Clement L, Van de Weygaert J, Van Hecke P, Duytschaever G,  
767 Aerts M, Dawyndt P, De Boeck K, Vandamme P, Devreese B. 2016. Faecal proteomics: A  
768 tool to investigate dysbiosis and inflammation in patients with cystic fibrosis. *Journal of*  
769 *Cystic Fibrosis* 15:242–250.
- 770 65. Bernard R, Shilts MH, Strickland BA, Boone HH, Payne DC, Brown RF, Edwards K, Das  
771 SR, Nicholson MR. 2023. The relationship between the intestinal microbiome and body  
772 mass index in children with cystic fibrosis. *Journal of Cystic Fibrosis*  
773 <https://doi.org/10.1016/j.jcf.2023.11.002>.
- 774 66. Hollister EB, Riehle K, Luna RA, Weidler EM, Rubio-Gonzales M, Mistretta TA, Raza S,  
775 Doddapaneni H V., Metcalf GA, Muzny DM, Gibbs RA, Petrosino JF, Shulman RJ,  
776 Versalovic J. 2015. Structure and function of the healthy pre-adolescent pediatric gut  
777 microbiome. *Microbiome* 3:36.
- 778 67. Mehta RS, Abu-Ali GS, Drew DA, Lloyd-Price J, Subramanian A, Lochhead P, Joshi AD,  
779 Ivey KL, Khalili H, Brown GT, Dulong C, Song M, Nguyen LH, Mallick H, Rimm EB,  
780 IZard J, Huttenhower C, Chan AT. 2018. Stability of the human faecal microbiome in a  
781 cohort of adult men. *Nat Microbiol* 3:347–355.
- 782 68. David LA, Materna AC, Friedman J, Campos-Baptista MI, Blackburn MC, Perrotta A,  
783 Erdman SE, Alm EJ. 2014. Host lifestyle affects human microbiota on daily timescales.  
784 *Genome Biol* 15.

- 785 69. Faith JJ, Guruge JL, Charbonneau M, Subramanian S, Seedorf H, Goodman AL, Clemente  
786 JC, Knight R, Heath AC, Leibel RL, Rosenbaum M, Gordon JI. 2013. The long-term  
787 stability of the human gut microbiota. *Science* (1979) 341.
- 788 70. Yamada A, Komaki Y, Komaki F, Micic D, Zullo S, Sakuraba A. 2018. Risk of  
789 gastrointestinal cancers in patients with cystic fibrosis: a systematic review and meta-  
790 analysis. *Lancet Oncol* 19:758–767.
- 791 71. Garg M, Leach ST, Coffey MJ, Katz T, Strachan R, Pang T, Needham B, Lui K, Ali F,  
792 Day AS, Appleton L, Moeeni V, Jaffe A, Ooi CY. 2017. Age-dependent variation of fecal  
793 calprotectin in cystic fibrosis and healthy children. *Journal of Cystic Fibrosis* 16:631–636.
- 794 72. Rumman N, Sultan M, El-Chammas K, Goh V, Salzman N, Quintero D, Werlin S. 2014.  
795 Calprotectin in Cystic Fibrosis. *BMC Pediatr* 14.
- 796 73. Beaufils F, Mas E, Mittaine M, Addra M, Fayon M, Delhaes L, Clouzeau H, Galode F,  
797 Lamireau T, Bui S, Enaud R. 2020. Increased Fecal Calprotectin Is Associated with  
798 Worse Gastrointestinal Symptoms and Quality of Life Scores in Children with Cystic  
799 Fibrosis. *J Clin Med* 9:4080.
- 800 74. Schwarzenberg SJ, Vu PT, Skalland M, Hoffman LR, Pope C, Gelfond D, Narkewicz MR,  
801 Nichols DP, Heltshe SL, Donaldson SH, Frederick CA, Kelly A, Pittman JE, Ratjen F,  
802 Rosenfeld M, Sagel SD, Solomon GM, Stalvey MS, Clancy JP, Rowe SM, Freedman SD.  
803 2022. Elexacaftor/tezacaftor/ivacaftor and gastrointestinal outcomes in cystic fibrosis:  
804 Report of promise-GI. *Journal of Cystic Fibrosis* <https://doi.org/10.1016/j.jcf.2022.10.003>.
- 805 75. Mainz JG, Lester K, Elnazir B, Williamson M, McKone E, Cox D, Linnane B, Zagoya C,  
806 Duckstein F, Barucha A, Davies JC, McNally P. 2023. Reduction in abdominal symptoms  
807 (CFAbd-Score), faecal M2-pyruvate-kinase and Calprotectin over one year of treatment  
808 with Elexacaftor-Tezacaftor-Ivacaftor in people with CF aged  $\geq 12$  years – The  
809 RECOVER study. *Journal of Cystic Fibrosis* <https://doi.org/10.1016/j.jcf.2023.10.001>.
- 810 76. Baldwin-Hunter BL, Rozenberg FD, Annavaajhala MK, Park H, DiMango EA, Keating  
811 CL, Uhlemann A-C, Abrams JA. 2023. The gut microbiome, short chain fatty acids, and  
812 related metabolites in cystic fibrosis patients with and without colonic adenomas. *Journal*  
813 *of Cystic Fibrosis* <https://doi.org/10.1016/j.jcf.2023.01.013>.
- 814 77. Miragoli F, Federici S, Ferrari S, Minuti A, Rebecchi A, Bruzzese E, Buccigrossi V,  
815 Guarino A, Callegari ML. 2017. Impact of cystic fibrosis disease on archaea and bacteria  
816 composition of gut microbiota. *FEMS Microbiol Ecol* 93.
- 817 78. Burke DG, Fouhy F, Harrison MJ, Rea MC, Cotter PD, O’Sullivan O, Stanton C, Hill C,  
818 Shanahan F, Plant BJ, Ross RP. 2017. The altered gut microbiota in adults with cystic  
819 fibrosis. *BMC Microbiol* 17:1–11.
- 820 79. Rivera-Chávez F, Lopez CA, Bäumlner AJ. 2017. Oxygen as a driver of gut dysbiosis. *Free*  
821 *Radic Biol Med*. Elsevier Inc. <https://doi.org/10.1016/j.freeradbiomed.2016.09.022>.
- 822 80. Shah YM. 2016. The role of hypoxia in intestinal inflammation. *Mol Cell Pediatr* 3.
- 823 81. Rigottier-Gois L. 2013. Dysbiosis in inflammatory bowel diseases: The oxygen  
824 hypothesis. *ISME Journal* <https://doi.org/10.1038/ismej.2013.80>.
- 825 82. López-Causapé C, Rojo-Molinero E, MacIà MD, Oliver A. 2015. The problems of  
826 antibiotic resistance in cystic fibrosis and solutions. *Expert Rev Respir Med*. Expert  
827 Reviews Ltd. <https://doi.org/10.1586/17476348.2015.995640>.
- 828 83. Taylor SL, Leong LEX, Sims SK, Keating RL, Papanicolaou LE, Richard A, Mobegi FM,  
829 Wesselingh S, Burr LD, Rogers GB. 2021. The cystic fibrosis gut as a potential source of  
830 multidrug resistant pathogens. *Journal of Cystic Fibrosis* 20:413–420.

- 831 84. Fredriksen S, de Warle S, van Baarlen P, Boekhorst J, Wells JM. 2023. Resistome  
832 expansion in disease-associated human gut microbiomes. *Microbiome* 11:166.  
833 85. Patel D, Mathews S, van Unen V, Chan JE, Al-Hammadi N, Borowitz D, Gelfond D,  
834 Sellers ZM. 2022. Impaired distal colonic pH in adults with cystic fibrosis. *Journal of*  
835 *Cystic Fibrosis* <https://doi.org/10.1016/j.jcf.2022.12.011>.  
836 86. Gelfond D, Heltshe S, Ma C, Rowe SM, Frederick C, Uluer A, Sicilian L, Konstan M,  
837 Tullis E, Roach RNC, Griffin K, Joseloff E, Borowitz D. 2017. Impact of CFTR  
838 modulation on intestinal pH, motility, and clinical outcomes in patients with cystic fibrosis  
839 and the G551D mutation. *Clin Transl Gastroenterol* 8.

840

## 841 **TABLES AND FIGURES**

842 **Table 1. Cohort Baseline Details**

843 **Figure 1. Study Schematic, Timeline, and Clinical Improvement after ELX/TEZ/IVA**

844 **Figure 2. Microbiome Diversity Increases After ELX/TEZ/IVA**

845 **Figure 3. Intestinal Carriage of Antibiotic Resistance Genes**

846 **Figure 4. Specific Microbial Taxonomic Changes after ELX/TEZ/IVA**

847 **Figure 5. Intestinal Inflammation Decreases after ELX/TEZ/IVA and Microbiome**

848 **Functional Changes**

849 **Supplementary Figure 1. Clinical Data Across the Four-Timepoints**

850 **Supplementary Figure 2. Microbiome Alpha Diversity and Beta Diversity**

851 **Supplementary Figure 3. Prior CFTR Modulators and Microbiome Diversity**

852 **Supplementary Figure 4. Reduced Abundance of Intestinal Antibiotic Resistance Genes**

853 **Supplementary Figure 5. Respiratory Taxa in Stool Samples**

854 **Supplementary Figure 6. Fecal Calprotectin at Four-Timepoints and Differentially**

855 **Abundant KEGG Orthology Groups**

856 **Supplementary Figure 7. Differentially Abundant MetaCyc Pathways**

857 **Supplementary Table S1. Complete Metadata**

858 **Supplementary Table S2. Species MaAsLin2 Results**

859 **Supplementary Table S3. Differentially Abundant Species with Respect to ELX/TEZ/IVA**

860 **Supplementary Table S4. MaAsLin2 Results Across Taxonomic Levels**

861 **Supplementary Table S5. MaAsLin2 Results of Antibiotic Resistance Genes**

862 **Supplementary Table S6. MaAsLin2 Results of KEGG Orthology Groups**

863 **Supplementary Table S7. Differentially Abundant KEGG Orthology Groups with Respect**

864 **to ELX/TEZ/IVA**

865 **Supplementary Table S8. MaAsLin2 Results of MetaCyc Pathways**

866 **Supplementary Table S9. Differentially Abundant MetaCyc Pathways with Respect to**

867 **ELX/TEZ/IVA**

868 **Supplementary Table S10. Stratified Taxonomic Output of Differentially Abundant KEGG**  
869 **Orthology Groups**

870 **Supplementary Dataset 1. Compiled Metadata and Metagenomic Results**

871

872 **FIGURE LEGENDS**

873

874 **Figure 1. Study Schematic, Timeline, and Clinical Improvement after ELX/TEZ/IVA.**

875 **A)** Overview of study procedure and analyses. **B)** Timeline illustrating the four timepoints. Day 0  
876 is depicted as the day of ELX/TEZ/IVA initiation. A total of 114 samples were collected from 39  
877 unique patients, of which 53 samples were before ELX/TEZ/IVA treatment and 61 samples after  
878 treatment. **C-E)** Depictions of clinical data before and after ELX/TEZ/IVA; **(C)** ppFEV1, **(D)** BMI  
879 percentile, **(E)** antibiotic days per 6-months. Each dot represents the clinical data associated  
880 with a stool sample. P values calculated by Wilcoxon rank-sum test.

881

882 **Figure 2. Microbiome Diversity and Intestinal Carriage of Antibiotic Resistance Genes.**

883 **A)** Phylum level relative abundance for samples collected before (samples=53) and after  
884 (samples=61) ELX/TEZ/IVA. Samples are organized by the relative abundance of the phylum  
885 Firmicutes. **B-C)** Alpha diversity before and after ELX/TEZ/IVA. Shannon Index calculated with  
886 the R package vegan using species abundance table from Metaphlan4. Microbial richness  
887 represents the number of unique species per sample. Each dot represents a stool sample  
888 (samples=114). P values calculated by Wilcoxon rank-sum test. **D-E)** Alpha diversity between  
889 samples with and without recent antibiotic exposure. Recent antibiotic exposure categorized as  
890 any systemic antibiotic within the past 6-months. Shannon Index calculated with the R package  
891 vegan using species abundance table from MetaPhlan4. Microbial richness represents the  
892 number of unique species per sample. Each dot represents a stool sample (samples=114). P  
893 values calculated by Wilcoxon rank-sum test.

894

895 **Figure 3. A)** Antibiotic resistance gene (ARG) abundance (RPKM) before and after  
896 ELX/TEZ/IVA. ARGs were profiled using ShortBRED and the Comprehensive Antibiotic  
897 Resistance Database (CARD). Each dot represents a stool sample (samples=114). P values  
898 calculated by Wilcoxon rank-sum test. **B)** ARG abundance (RPKM) by class of antibiotic to  
899 which they confer resistance. Abundance values of zero are plotted on the vertical axis. P  
900 values calculated by Wilcoxon signed-rank test.

901



902 **Figure 4. Specific Microbial Taxonomic Changes after ELX/TEZ/IVA.**

903 **A)** Differentially abundant species before and after ELX/TEZ/IVA. The results are depicted with  
904 significance ( $-\log_{10}$  of the FDR) (Y axis) vs.  $\log_2(\text{FoldChange})$ . MaAsLin2 multivariable  
905 association modeling was implemented in R, using ELX/TEZ/IVA status, age, and recent  
906 antibiotics as fixed effects in the model. Participant ID was used as a random effect. Horizontal  
907 dashed line depicts FDR=0.1. Species reaching statistical significance (FDR $\leq$ 0.10) are  
908 highlighted in solid colors whereas other species are gray. **B)** Species of interest from  
909 differential abundance testing before and after ELX/TEZ/IVA. Vertical axis is  $\log_{10}$  transformed.  
910 MaAsLin2 FDR is depicted. Zero values are plotted on the horizontal axes. The percentage of  
911 samples for which the relative abundance was zero is depicted below the graph.

912

913 **Figure 5. Intestinal Inflammation Decreases after ELX/TEZ/IVA and Microbiome**

914 **Functional Changes. A)** Fecal calprotectin before and after ELX/TEZ/IVA. Each dot represents  
915 a stool sample (samples=114). P values calculated by Wilcoxon rank-sum test. **B-C)** Microbial  
916 dysbiosis index (MD-INDEX) before and after ELX/TEZ/IVA (**B**) or between samples with and  
917 without recent antibiotic exposure (**C**). MD-index calculated as the  $\log_{10}$  ratio of species  
918 positively/negatively correlated with new onset pediatric Crohn's disease (44). Each dot  
919 represents a stool sample (samples=114). P values calculated by Wilcoxon rank-sum test. **D)**  
920 Differentially abundant KEGG orthologs following MaAsLin2 multivariable association modeling,  
921 using ELX/TEZ/IVA status, age, and recent antibiotics as fixed effects in the model. Participant  
922 ID was used as a random effect. Horizontal dashed line depicts FDR=0.25. **E)** Subset of  
923 differentially abundant MetaCyc pathways following MaAsLin2 multivariable association  
924 modeling, using ELX/TEZ/IVA status, age, and recent antibiotics as fixed effects in the model.  
925 Only pathways with FDR<0.25 are depicted.

926

927 **Supplementary Figure S1. A-D)** Clinical metadata vs. timepoint; **(A)** ppFEV1, **(B)** BMI  
928 percentile, **(C)** weight percentile, and **(D)** height percentile. Each dot represents the clinical data  
929 associated with a stool sample. Red line indicates the mean, and gray lines represent individual  
930 patients. P values calculated by Wilcoxon signed-rank test.

931

932 **Supplementary Figure S2. A-B)** Alpha diversity vs. timepoint. Shannon Index **(A)** calculated  
933 with the R package vegan using species abundance table from Metaphlan4. Microbial richness  
934 **(B)** represents the number of unique species per sample. Each dot represents a stool sample  
935 (samples=114). P values calculated by Wilcoxon signed-rank test. **C)** Principal component

936 analysis of Bray-Curtis distances before and after ELX/TEZ/IVA. Bray-Curtis distance matrix  
937 computed with vegan. PERMANOVA and PERMDISP computed by the vegan package with the  
938 functions adonis2 and betadisp, respectively. Ellipse depicts the 95% confidence level. **D)**  
939 Principal component analysis of weighted UniFrac distances before and after ELX/TEZ/IVA.  
940 Weighted UniFrac computed with MetaPhlAn4 R script. PERMANOVA and PERMDISP  
941 computed by the vegan package with the functions adonis2 and betadisp, respectively. Ellipse  
942 depicts the 95% confidence level. **E)** Principal component analysis of the Bray-Curtis distances  
943 between samples with and without recent antibiotic exposure. Distance matrix generated by the  
944 R package vegan using the MetaPhlAn4 species table. PERMANOVA and PERMDISP  
945 computed in vegan with the functions adonis2 and betadisp, respectively. Ellipse depicts the  
946 95% confidence level.

947  
948 **Supplementary Figure S3. A-B)** Diversity metrics of pre-ELX/TEZ/IVA samples (samples=53  
949 total). Samples are grouped by whether the subject was receiving another CFTR modulator at  
950 the time of sample collection (Yes=8, No=45). **C-D)** Diversity metrics of pre-ELX/TEZ/IVA  
951 samples (samples=53) compared to post-ELX/TEZ/IVA samples (samples=61). Post-  
952 ELX/TEZ/IVA samples were segregated by whether the subject had previously received any  
953 other CFTR modulator (Yes=20 samples, No=41 samples). Shannon Index calculated with the  
954 R package vegan using species abundance table from MetaPhlAn4. Microbial richness  
955 represents the number of unique species per sample. P values calculated by Wilcoxon rank-  
956 sum test.

957  
958 **Supplementary Figure S4. A)** Cumulative antibiotic days per 6-months prior to stool sample  
959 collection. P values calculated by Wilcoxon signed-rank test. **B)** ARG richness (unique genes)  
960 before and after ELX/TEZ/IVA. ARGs were profiled using ShortBRED and the Comprehensive  
961 Antibiotic Resistance Database (CARD). Each dot represents a stool sample (samples=114). P  
962 values calculated by Wilcoxon rank-sum test. **C)** Cumulative relative abundance (RPKM) of  
963 ARGs conferring resistance to peptide antibiotics. P values calculated by Wilcoxon rank-sum  
964 test. **D)** Relative abundance (RPKM) of the most prevalent ARGs conferring resistance to  
965 peptide antibiotics. MaAsLin2 FDR is depicted. **E)** Cumulative relative abundance (RPKM) of  
966 ARGs conferring resistance to other antibiotics. P values calculated by Wilcoxon rank-sum test.  
967 **F)** Relative abundance (RPKM) of the most prevalent ARGs conferring resistance to other  
968 antibiotics. MaAsLin2 FDR is depicted.

969

970 **Supplementary Figure S5. A)** *Roseburia faecis* relative abundance between samples with and  
971 without recent antibiotic exposure. Each dot represents a stool sample (samples=114).  
972 MaAsLin2 FDR is depicted. **B)** Relative abundance of respiratory genera in stool samples  
973 before and after ELX/TEZ/IVA. Each dot represents a stool sample (samples=114). MaAsLin2  
974 FDR is depicted. Vertical axis is log<sub>10</sub> transformed. Zero values are plotted on the horizontal  
975 axes.

976

977 **Supplementary Figure S6. A)** Fecal calprotectin (μg/g) vs. study timepoint. Red line indicates  
978 the mean, and gray lines represent individual patients. P values calculated by Wilcoxon signed-  
979 rank test. **B)** Differentially abundant oxidative phosphorylation KEGG orthology (KO) groups  
980 from MaAsLin2 (FDR<0.25). Groups correspond to red points in Fig. 5A. log<sub>2</sub>(FoldChange),  
981 which is equivalent to MaAsLin2 coefficient, is depicted. **C)** Taxonomic stratification of  
982 differentially abundant oxidative phosphorylation KO groups. KO groups correspond to groups in  
983 panel A.

984

985 **Supplementary Figure S7.** Differentially abundant MetaCyc pathways following MaAsLin2  
986 multivariable association modeling, using ELX/TEZ/IVA status, age, and recent antibiotics as  
987 fixed effects in the model. Only pathways with FDR<0.25 are depicted.

It is made available under a [CC-BY-ND 4.0 International license](https://creativecommons.org/licenses/by-nd/4.0/).

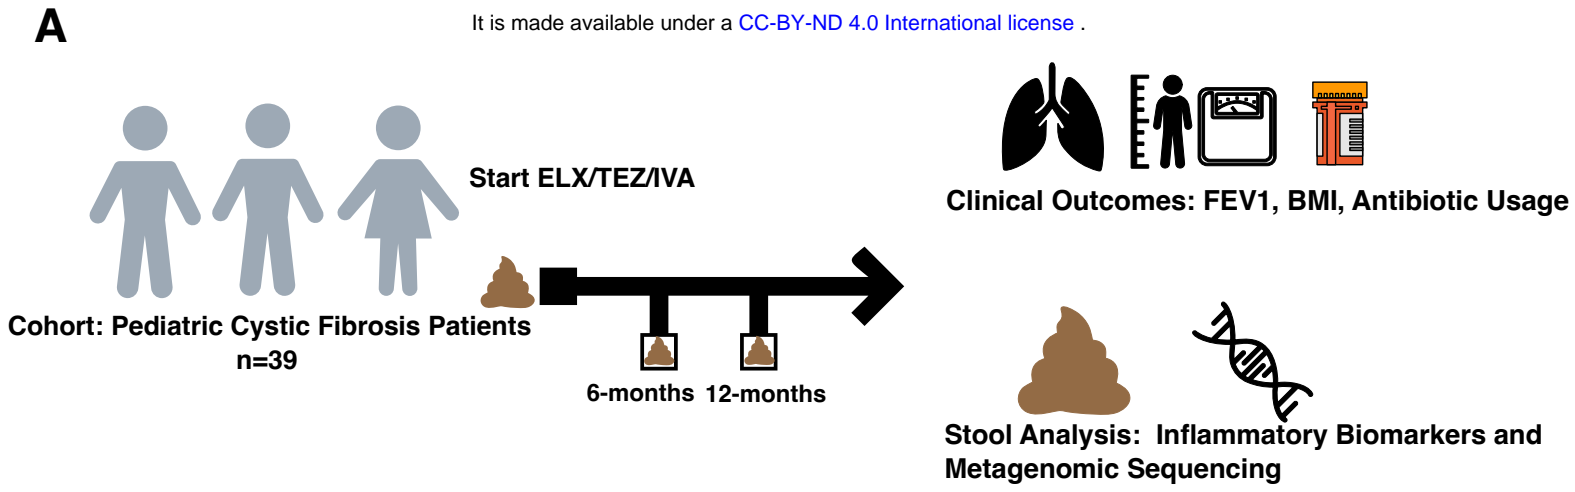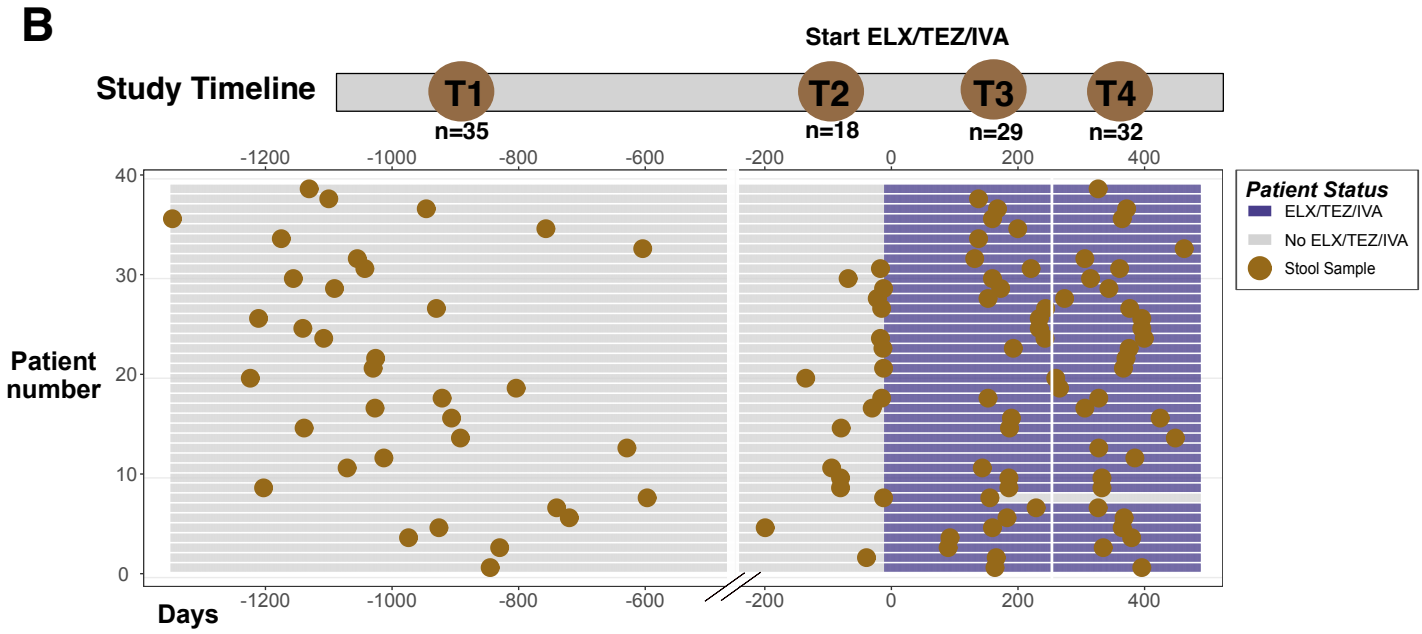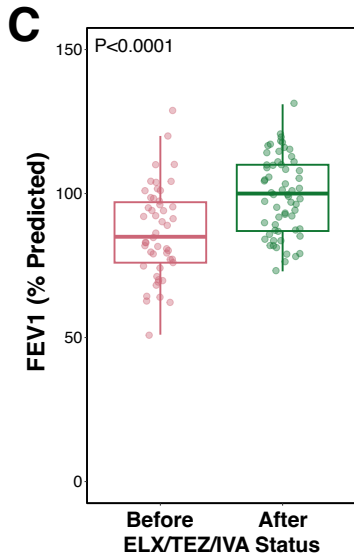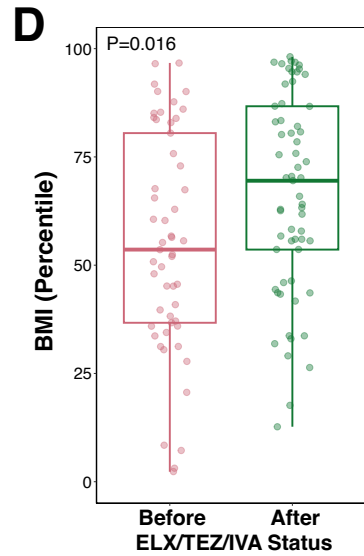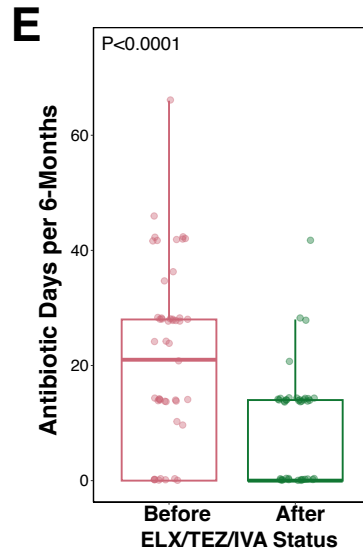

**A**

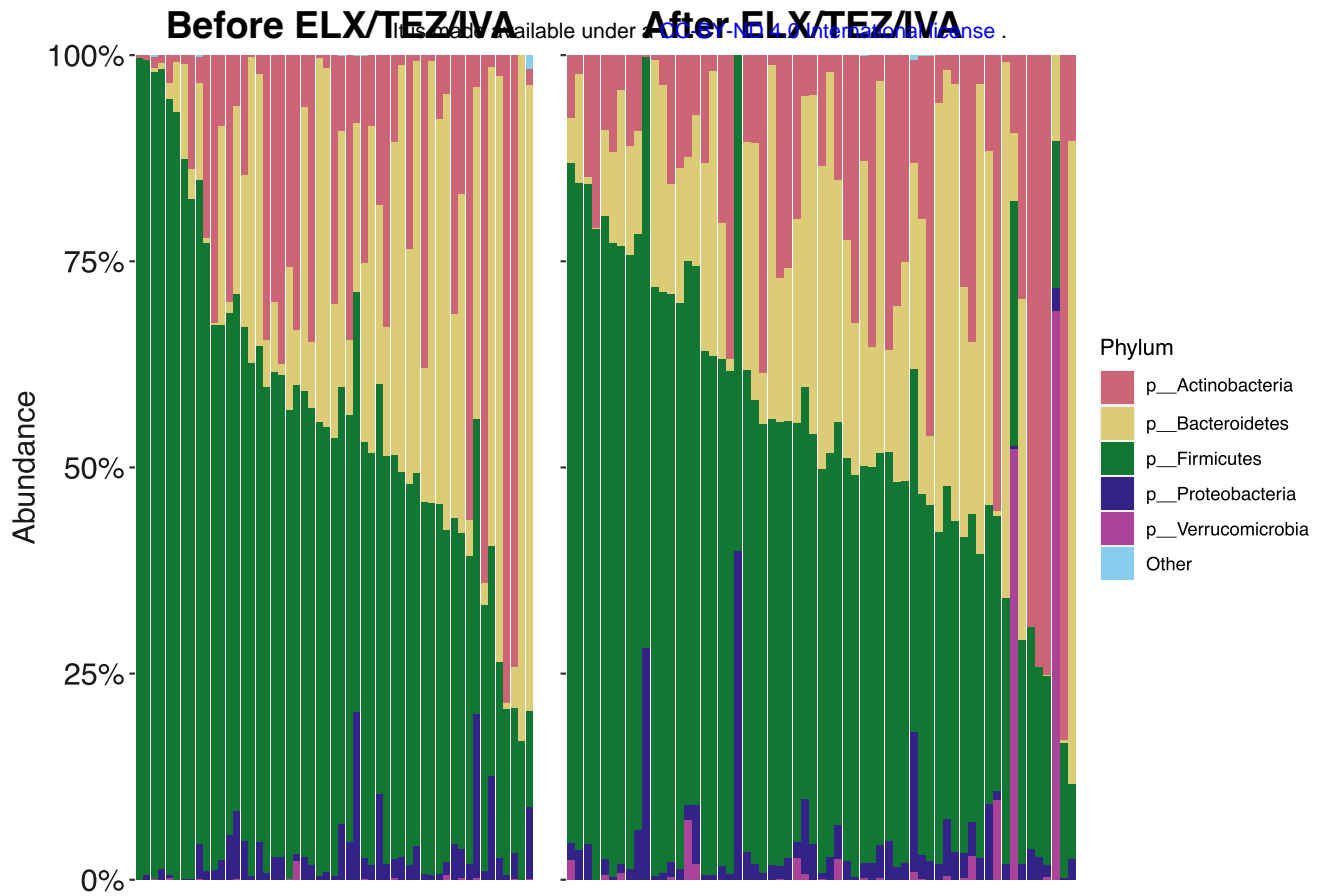

**B**

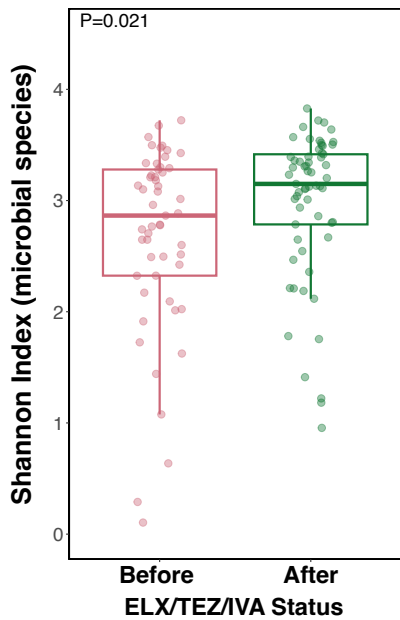

**C**

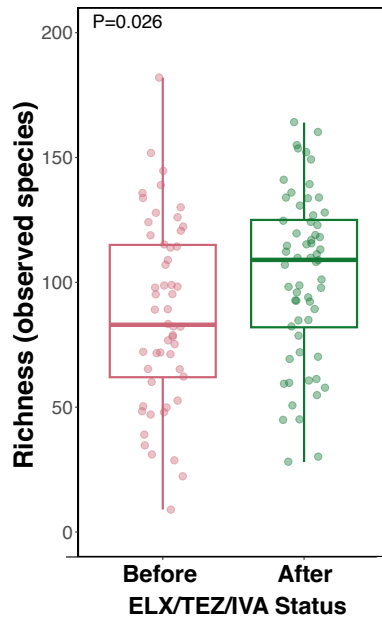

**D**

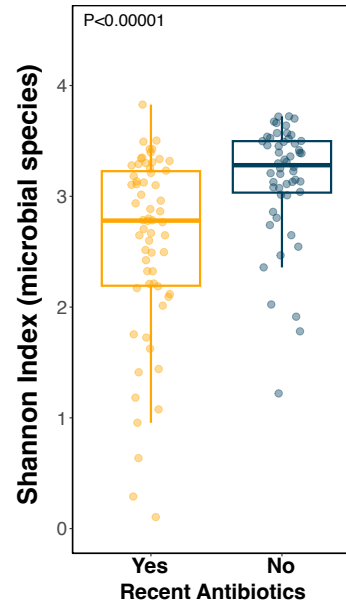

**E**

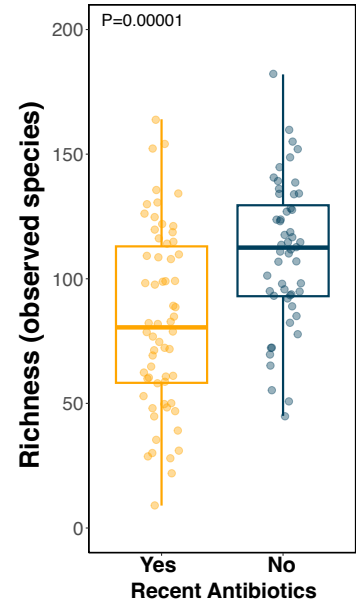

It is made available under a [CC-BY-ND 4.0 International license](https://creativecommons.org/licenses/by-nd/4.0/).

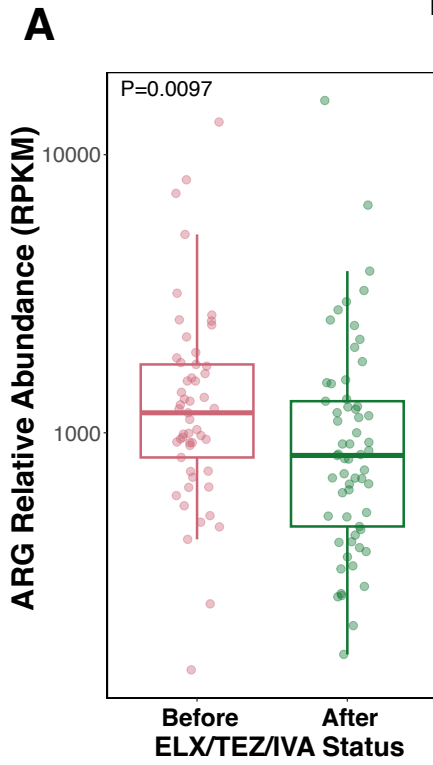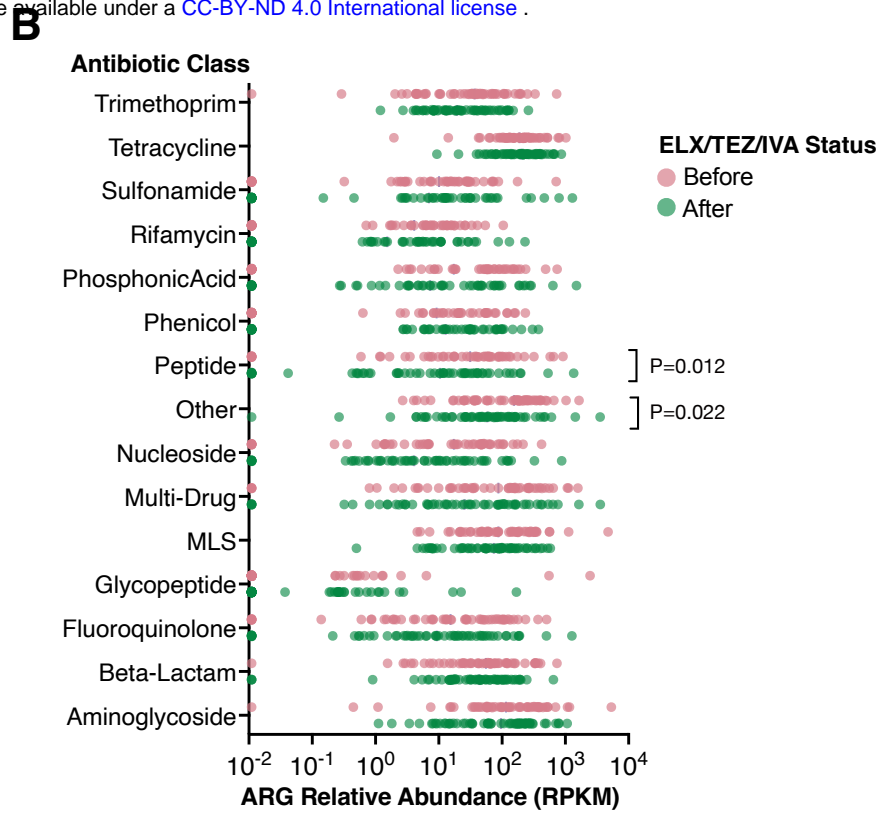

**A**

It is made available under a [CC-BY-ND 4.0 International license](https://creativecommons.org/licenses/by-nd/4.0/).

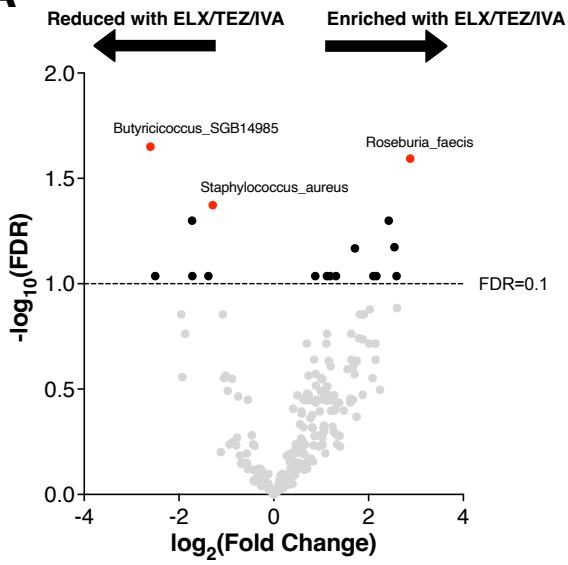

**B**

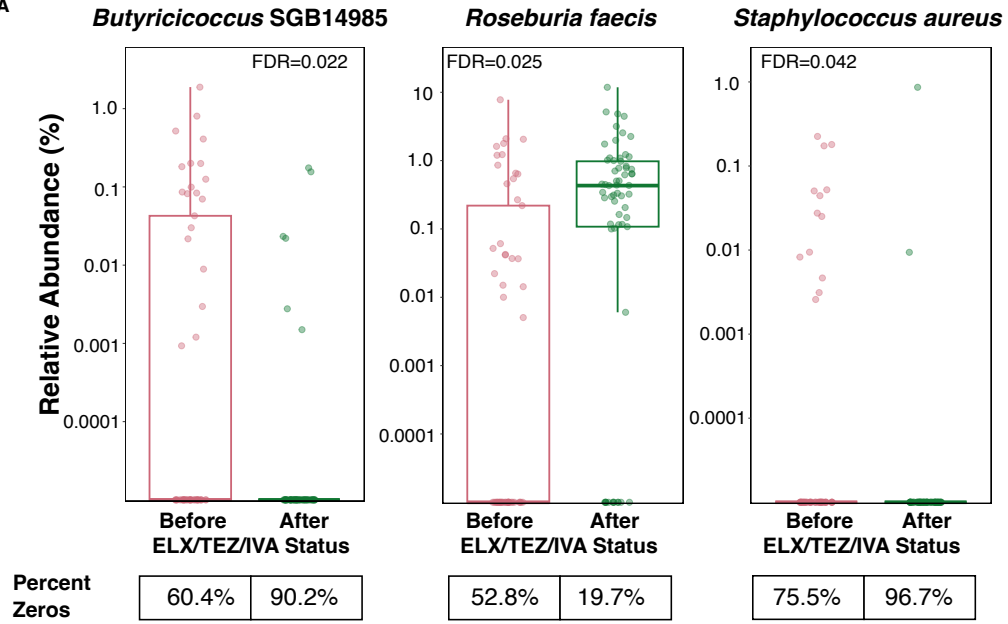

**A**

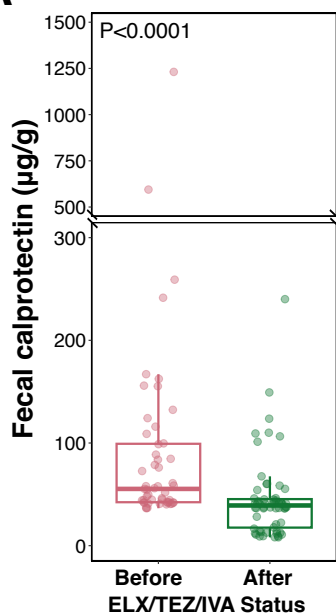

**B**

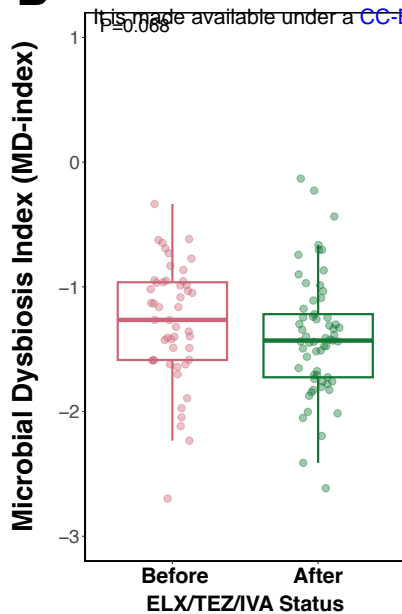

**C**

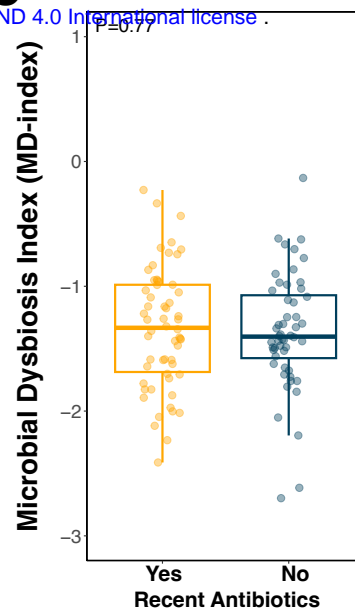

**D**

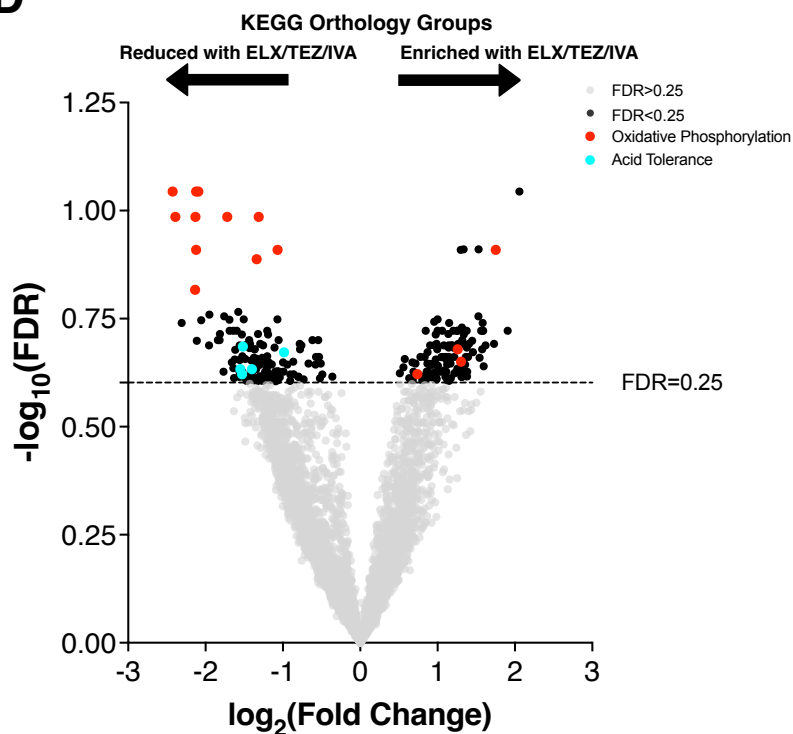

**E**

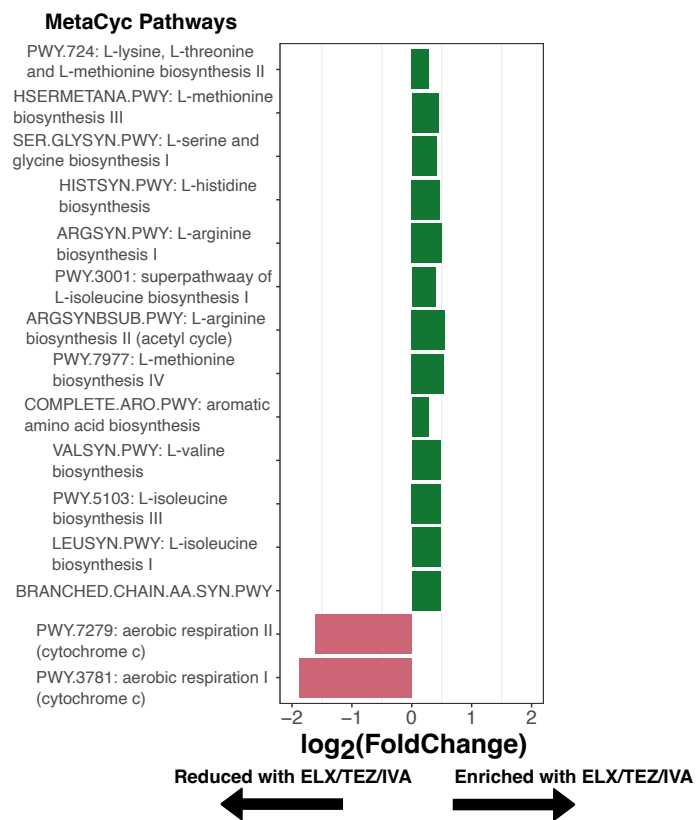



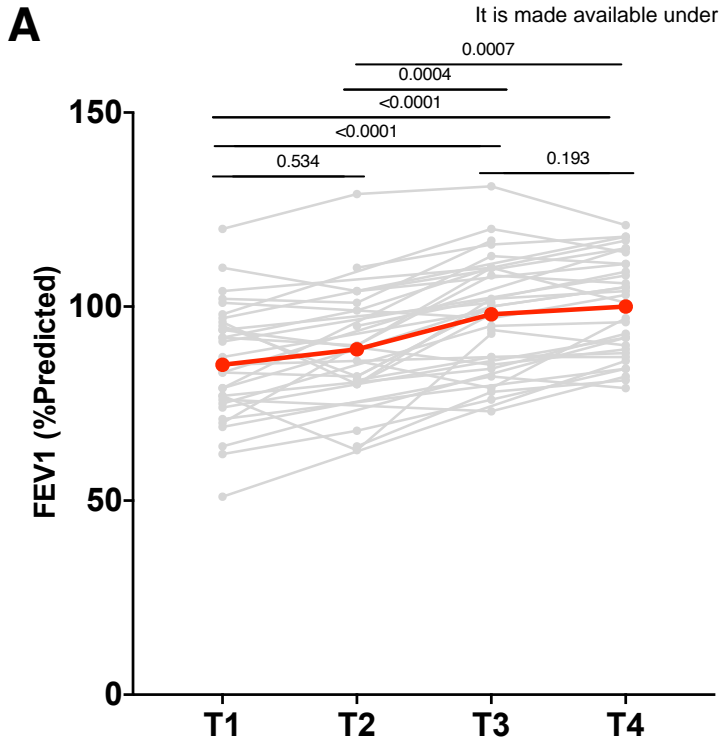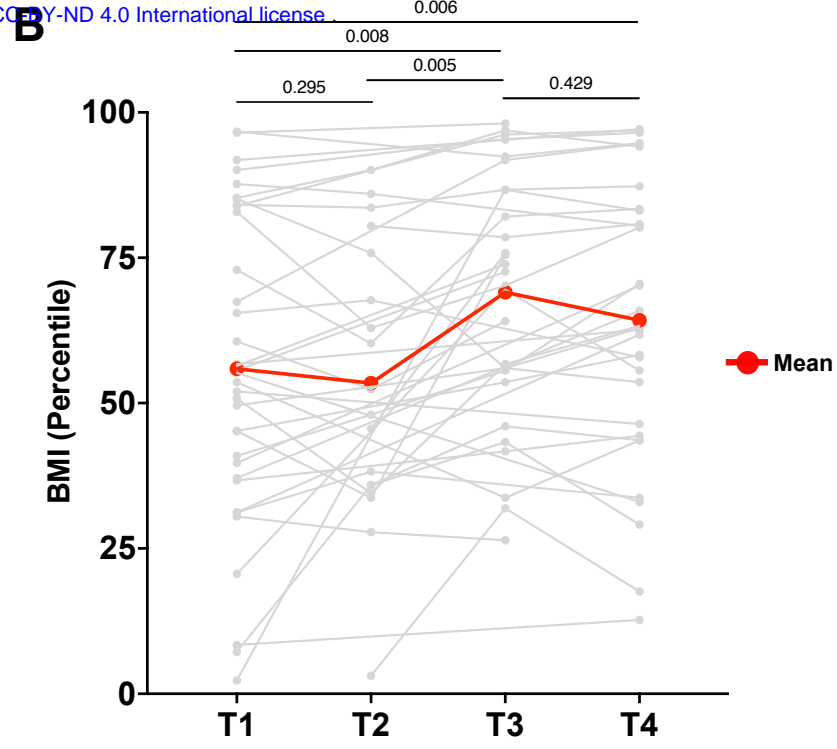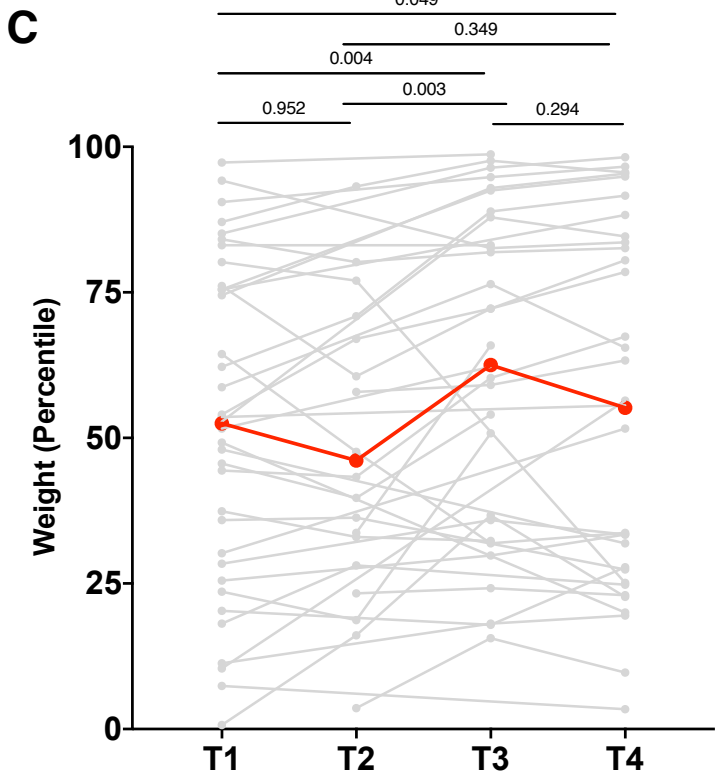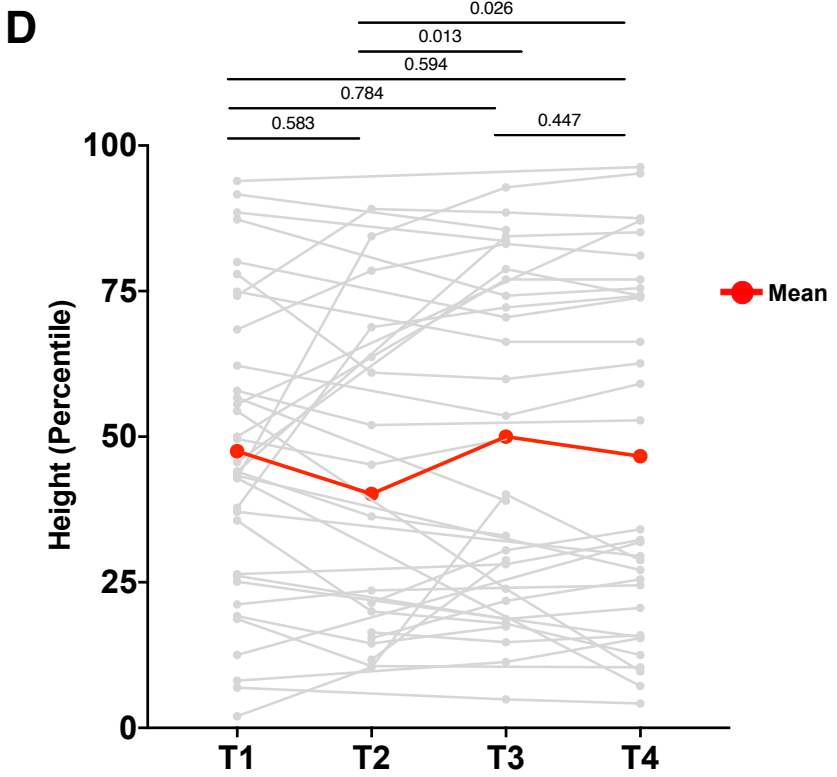

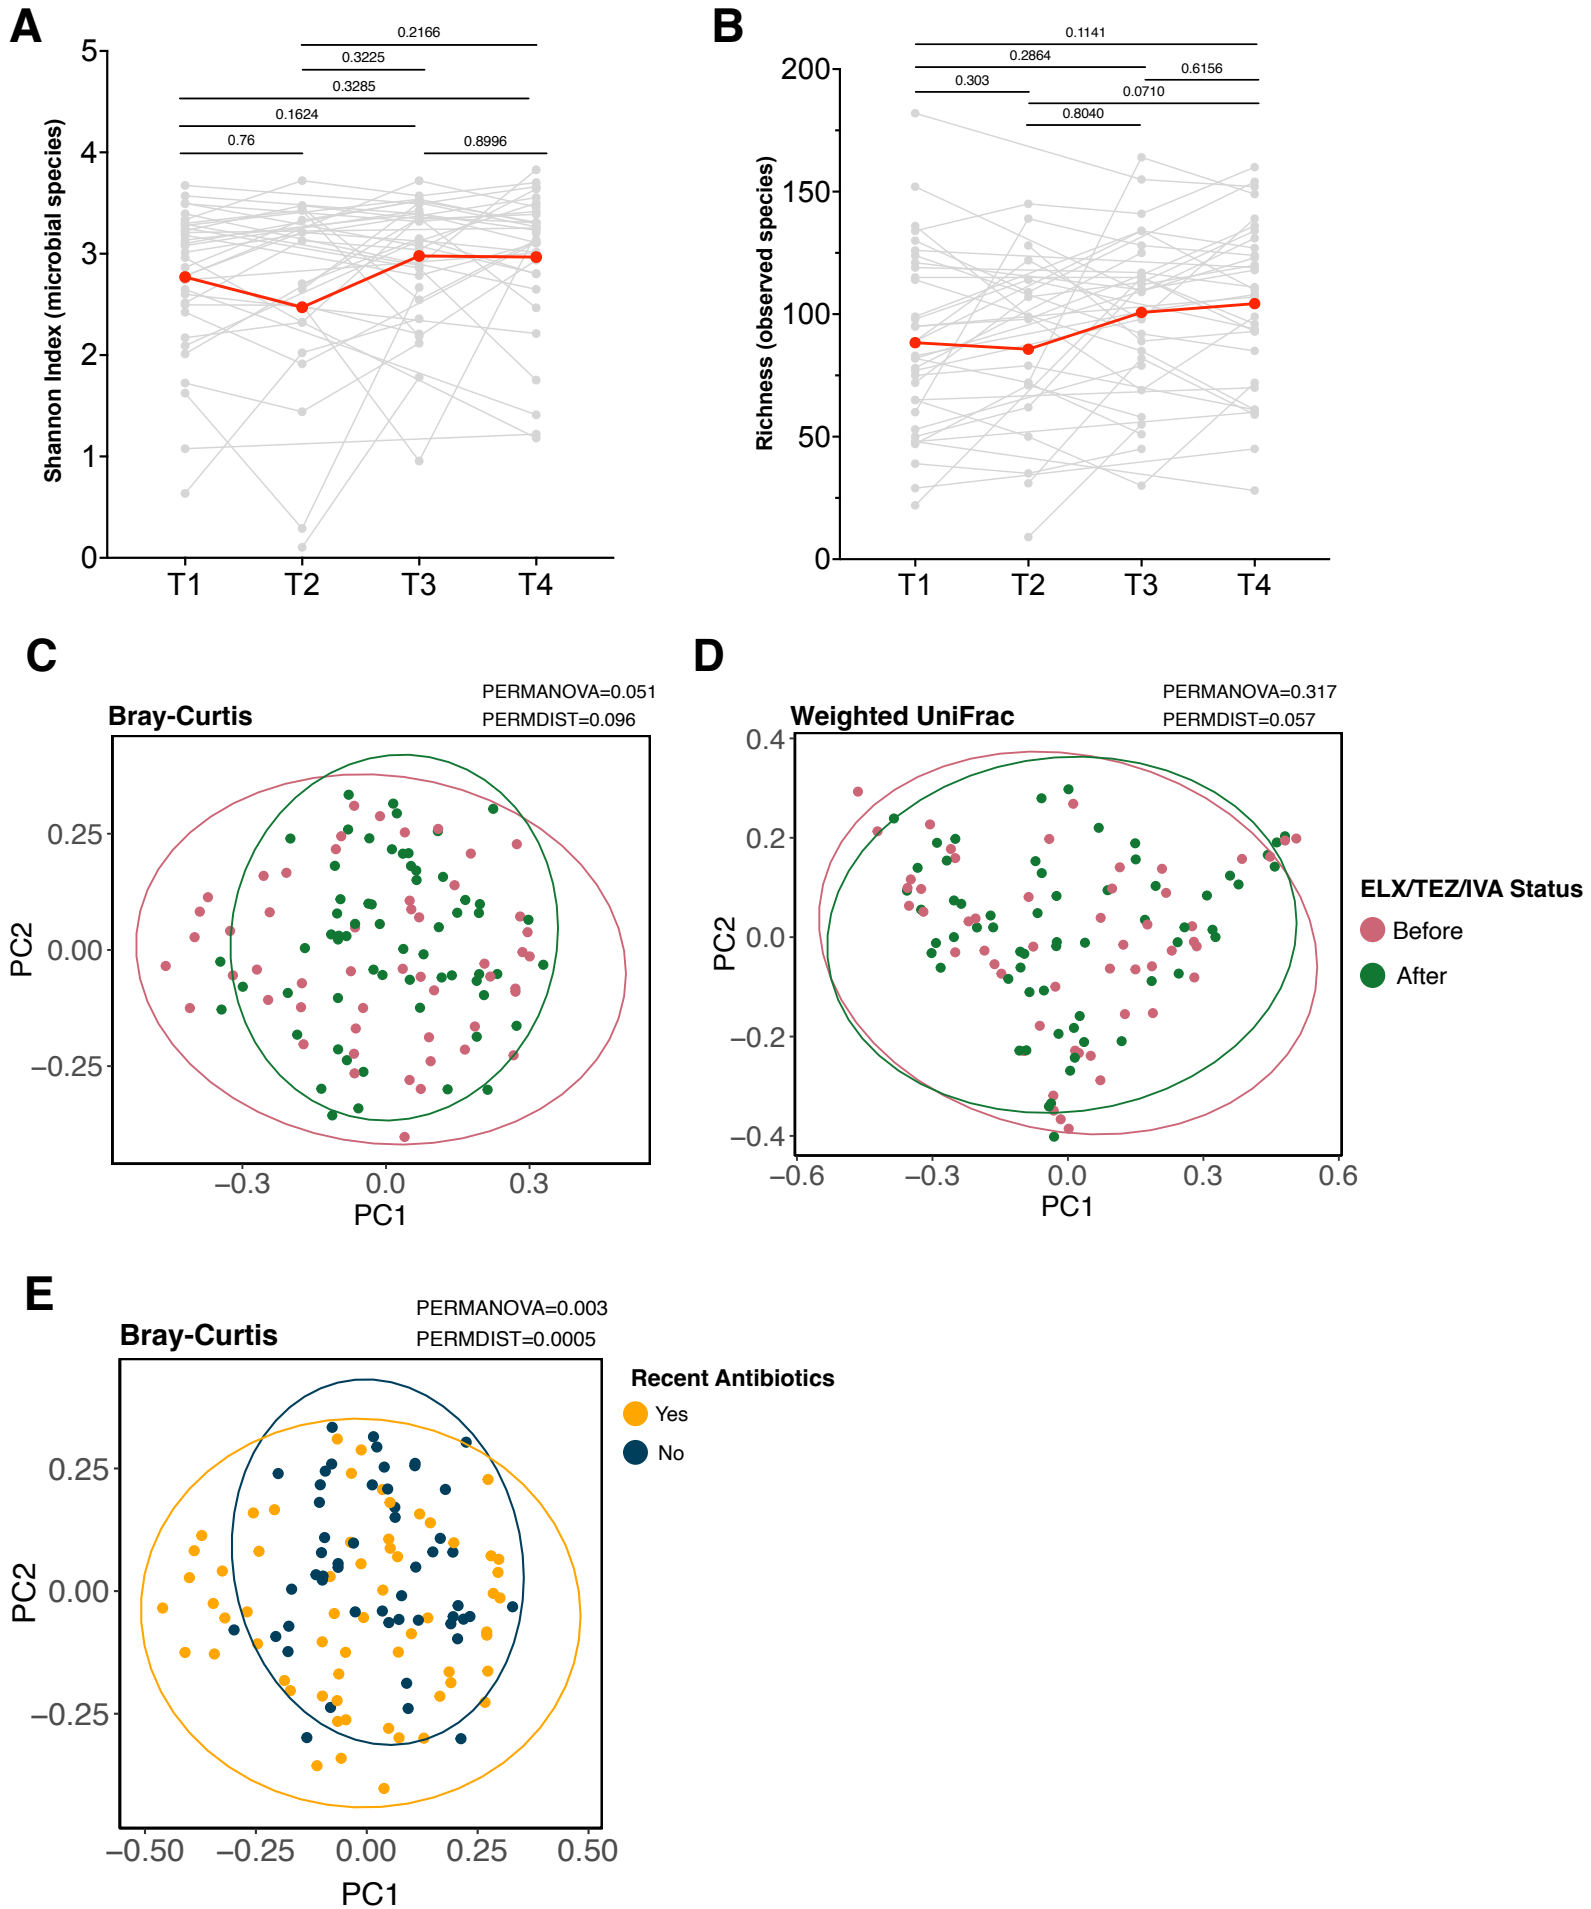

# Supplemental Figure 3

## Before ELX/TEZ/IVA

**53 total samples**

45 modulator naïve samples

8 samples on another modulator

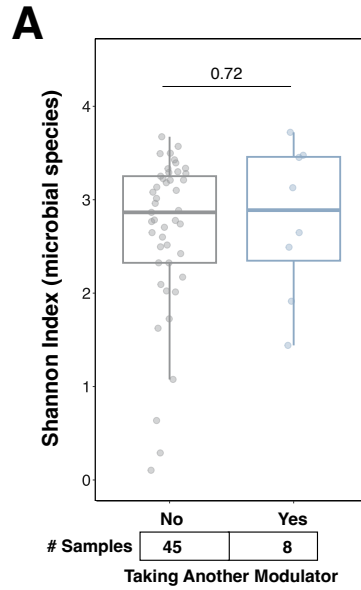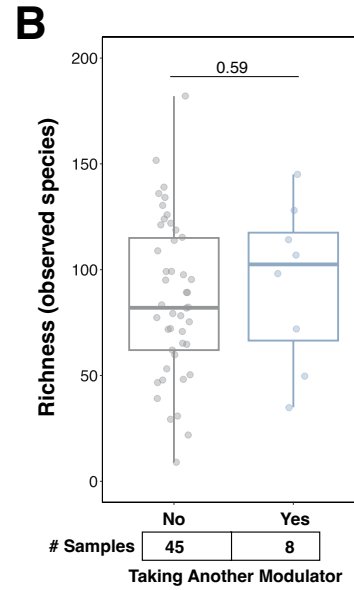

## After ELX/TEZ/IVA

**61 total samples**

41 samples from subjects without prior modulator use

20 samples from subjects with prior modulator use

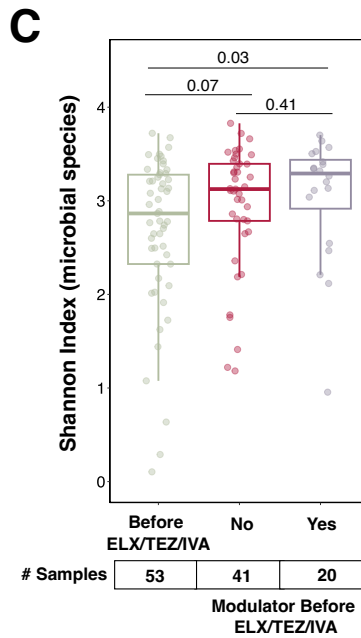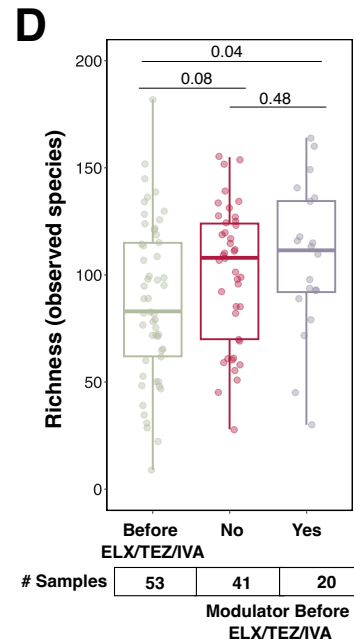

It is made available under a [CC-BY-ND 4.0 International license](https://creativecommons.org/licenses/by-nd/4.0/).

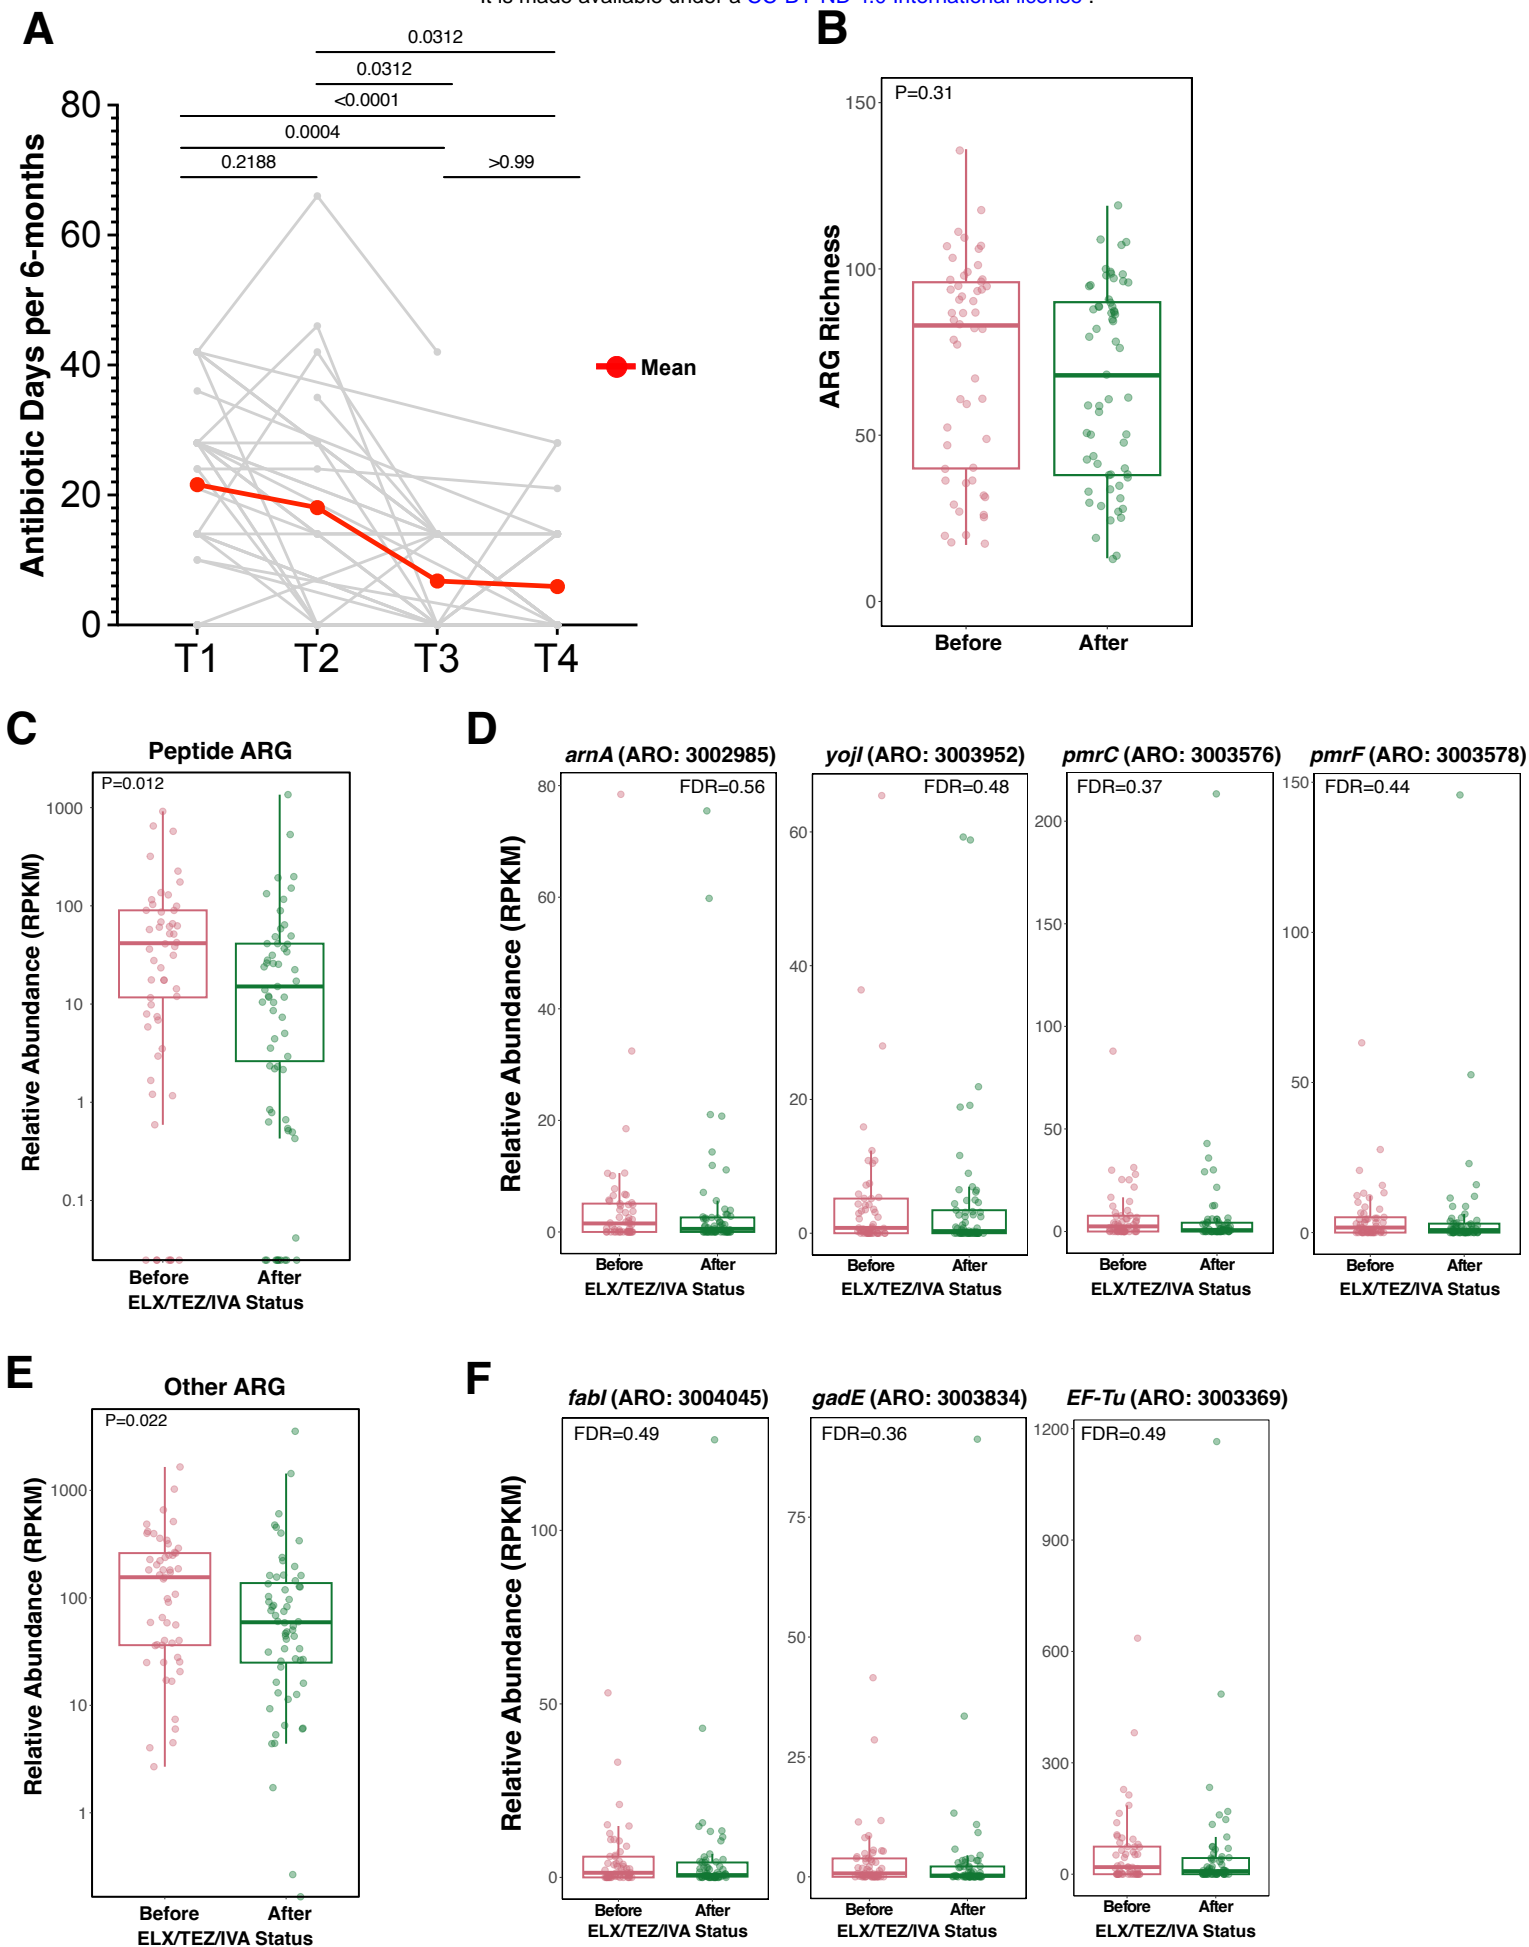

**A**

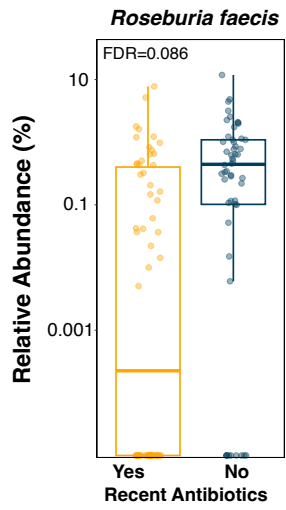

**B**

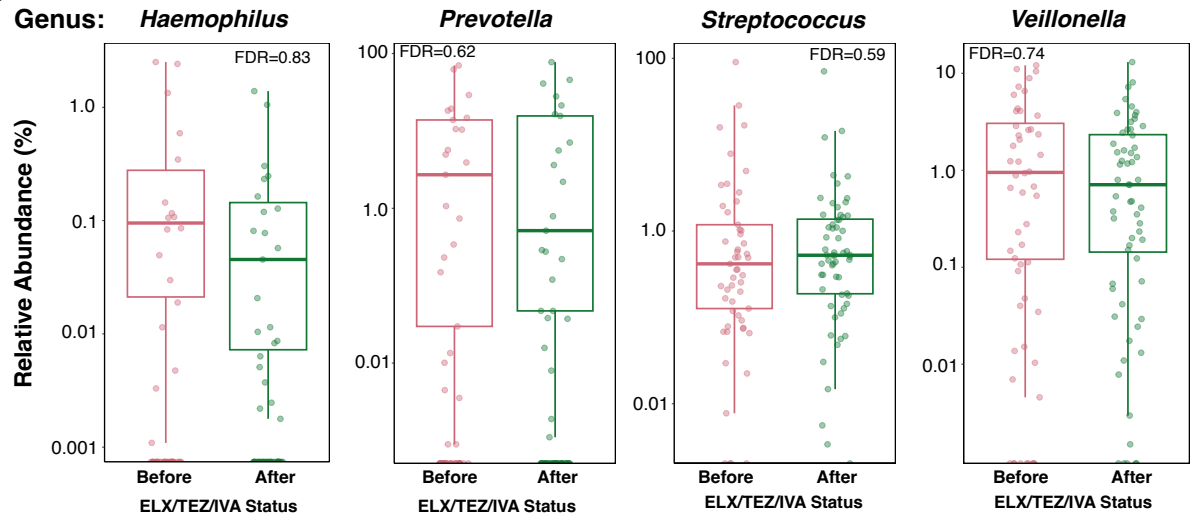

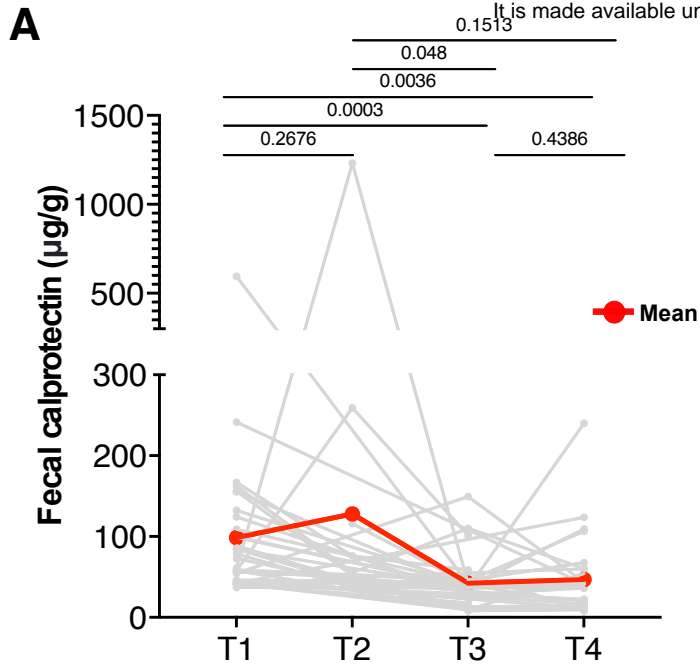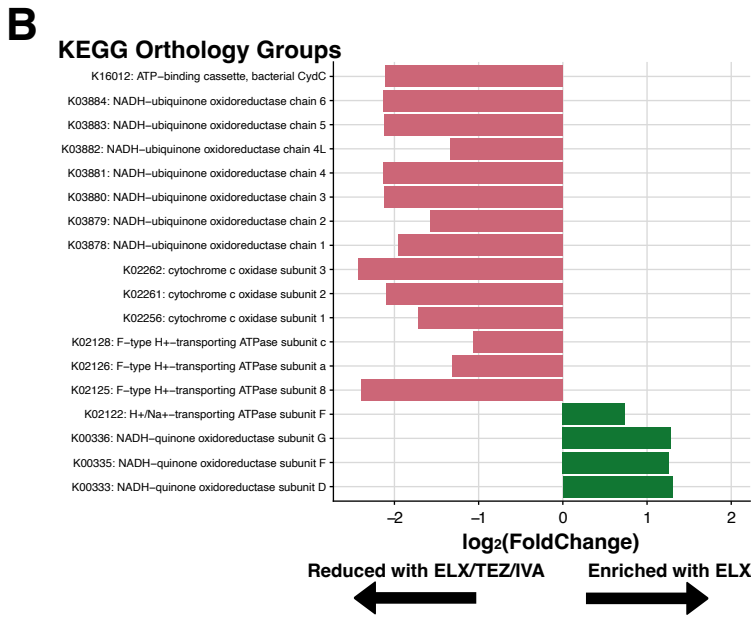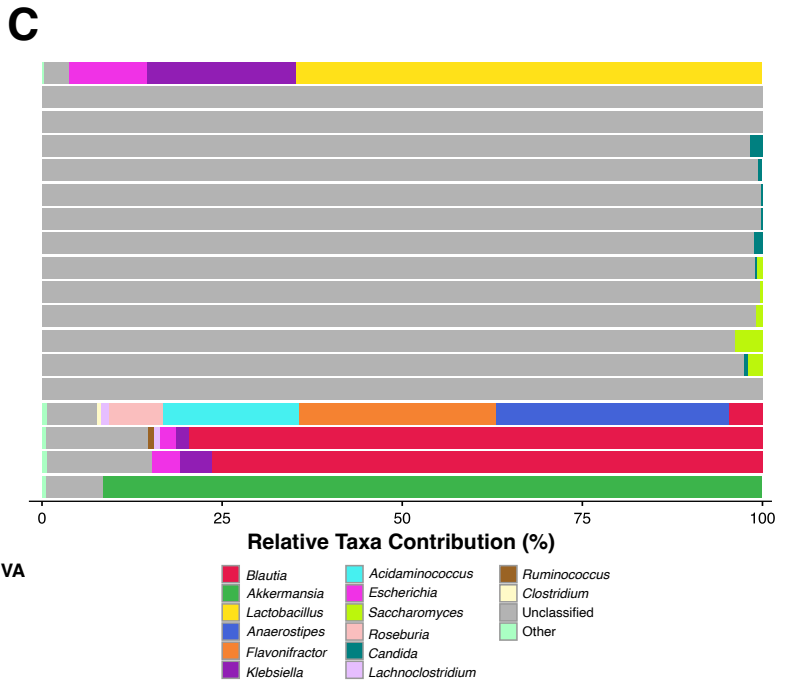

# Supplemental Figure 7

It is made available under a [CC-BY-ND 4.0 International license](https://creativecommons.org/licenses/by-nd/4.0/).

## MetaCyc Pathway

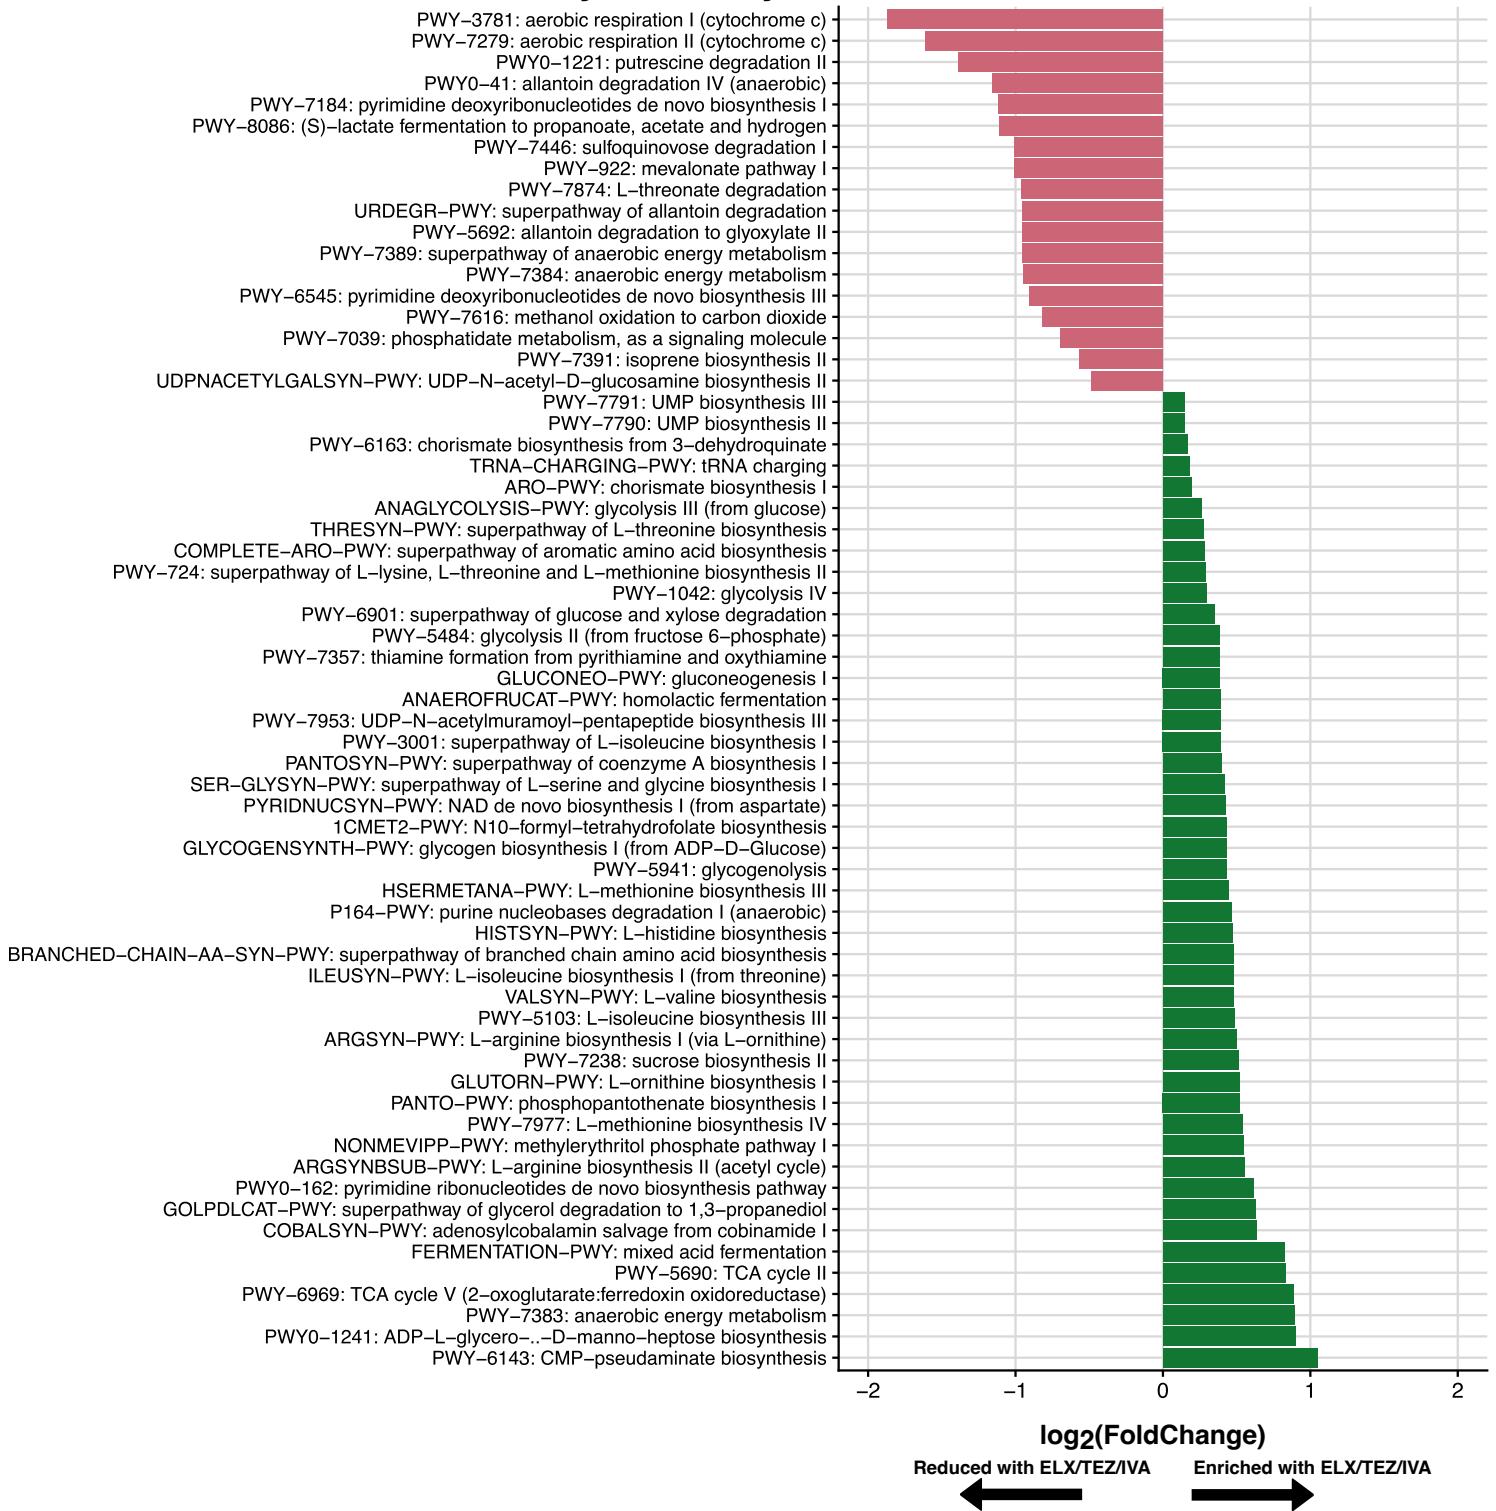

Source: https://medrxiv.org/content/10.1101/2023.08.11.23293949v2.full.pdf
